# Supplementary material for: Selective homodimerization of unprotected peptides using hybrid hydroxydimethylsilane derivatives
Source: Royal Society of Chemistry journal article supplement (doi:10.1039/c6ra06075g), 2016-01-01
Supplement: c6ra06075g1.pdf [file c6ra06075g1.pdf]

## Supporting information

# Selective Homodimerization of Unprotected Peptides Using Hybrid Hydroxydimethylsilane Derivatives

Cécile Echalié, Aleksandra Kalistratova, Jérémie Ciccione, Aurélien Lebrun,  
Baptiste Legrand, Emilia Naydenova, Didier Gagne, Jean-Alain Fehrentz, Jacky  
Marie, Muriel Amblard, Ahmad Mehdi, Jean Martinez, Gilles Subra

|                                                                                                                            |    |
|----------------------------------------------------------------------------------------------------------------------------|----|
| Abbreviations .....                                                                                                        | 4  |
| Material and Method .....                                                                                                  | 4  |
| 1,3-bis(3-aminopropyl)tetramethyl disiloxane hydrochloride <b>1a</b> .....                                                 | 5  |
| 1,3-bis(3-aminopropyl)tetramethyl disiloxane trifluoroacetate <b>1b</b> .....                                              | 8  |
| (3-aminopropyl)dimethylsilanol hydrochloride <b>2a</b> .....                                                               | 10 |
| (3-aminopropyl)dimethylsilanol trifluoroacetate <b>2b</b> .....                                                            | 14 |
| Counter-ion effect on NMR signals .....                                                                                    | 17 |
| DEPT <sup>29</sup> Si sequence optimization .....                                                                          | 18 |
| Stability studies of the siloxane bond in different solutions by <sup>1</sup> H-NMR .....                                  | 19 |
| Silanol condensation upon lyophilization .....                                                                             | 25 |
| N-ter hybrid monomer <b>4</b> .....                                                                                        | 26 |
| N-ter hybrid dimer <b>5</b> (JMV 6187) .....                                                                               | 27 |
| C-ter hybrid monomer <b>6</b> .....                                                                                        | 29 |
| C-ter hybrid dimer <b>7</b> (JMV 6186) .....                                                                               | 31 |
| Lys <sup>3</sup> hybrid monomer <b>8</b> .....                                                                             | 33 |
| Lys <sup>3</sup> hybrid dimer <b>9</b> (JMV 6185) .....                                                                    | 35 |
| Lys <sup>3</sup> (NH(CH <sub>2</sub> ) <sub>3</sub> Si(CH <sub>3</sub> ) <sub>3</sub> ) monomer <b>10</b> (JMV 6246) ..... | 37 |
| Lys <sup>3</sup> monomer <b>11</b> (JMV 6244) .....                                                                        | 40 |
| Lys <sup>3</sup> (Ac) monomer <b>12</b> (JMV 6245) .....                                                                   | 43 |
| Monomeric ligand binding assay .....                                                                                       | 46 |
| Bioactivity of monomeric ligands .....                                                                                     | 47 |

## Supporting information

|                                                                                                                                                                                                                                           |    |
|-------------------------------------------------------------------------------------------------------------------------------------------------------------------------------------------------------------------------------------------|----|
| <b>Figure S1.</b> $^1\text{H}$ NMR spectrum of <b>1a</b> in DMSO- $d_6$ (600 MHz) .....                                                                                                                                                   | 5  |
| <b>Figure S2.</b> $^{13}\text{C}$ NMR spectrum of <b>1a</b> in DMSO- $d_6$ (151 MHz) .....                                                                                                                                                | 6  |
| <b>Figure S3.</b> $^{29}\text{Si}$ NMR spectrum of <b>1a</b> in DMSO- $d_6$ (119 MHz) .....                                                                                                                                               | 6  |
| <b>Figure S4.</b> $^1\text{H}$ NMR spectrum of <b>1a</b> in $\text{D}_2\text{O}$ (600 MHz).....                                                                                                                                           | 7  |
| <b>Figure S5.</b> $^{13}\text{C}$ NMR spectrum of <b>1a</b> in $\text{D}_2\text{O}$ (151 MHz) .....                                                                                                                                       | 7  |
| <b>Figure S6.</b> $^{29}\text{Si}$ NMR spectrum of <b>1a</b> in $\text{D}_2\text{O}$ (119 MHz).....                                                                                                                                       | 8  |
| <b>Figure S7.</b> $^1\text{H}$ NMR spectrum of <b>1b</b> in DMSO- $d_6$ (600 MHz).....                                                                                                                                                    | 9  |
| <b>Figure S8.</b> $^{13}\text{C}$ NMR spectrum of <b>1b</b> in DMSO- $d_6$ (151 MHz).....                                                                                                                                                 | 9  |
| <b>Figure S9.</b> $^{29}\text{Si}$ NMR spectrum of <b>1b</b> in DMSO- $d_6$ (119 MHz).....                                                                                                                                                | 10 |
| <b>Figure S10.</b> $^1\text{H}$ NMR spectrum of <b>1a/2a</b> in DMSO- $d_6$ (600 MHz) .....                                                                                                                                               | 11 |
| <b>Figure S11.</b> $^{13}\text{C}$ NMR spectrum of <b>1a/2a</b> in DMSO- $d_6$ (151 MHz).....                                                                                                                                             | 11 |
| <b>Figure S12.</b> $^{29}\text{Si}$ NMR spectrum of <b>1a/2a</b> in DMSO- $d_6$ (119 MHz) .....                                                                                                                                           | 12 |
| <b>Figure S13.</b> $^1\text{H}$ NMR spectrum of <b>2a</b> in $\text{D}_2\text{O}$ (600 MHz).....                                                                                                                                          | 13 |
| <b>Figure S14.</b> $^{13}\text{C}$ NMR spectrum of <b>2a</b> in $\text{D}_2\text{O}$ (151 MHz) .....                                                                                                                                      | 13 |
| <b>Figure S15.</b> $^{29}\text{Si}$ NMR spectrum of <b>2a</b> in $\text{D}_2\text{O}$ (119 MHz).....                                                                                                                                      | 14 |
| <b>Figure S16.</b> $^1\text{H}$ NMR spectrum of <b>1b/2b</b> in DMSO- $d_6$ (600 MHz).....                                                                                                                                                | 14 |
| <b>Figure S17.</b> $^{13}\text{C}$ NMR spectrum of <b>1b/2b</b> in DMSO- $d_6$ (151 MHz) .....                                                                                                                                            | 15 |
| <b>Figure S18.</b> $^{29}\text{Si}$ NMR spectrum of <b>1b/2b</b> in DMSO- $d_6$ (119 MHz) .....                                                                                                                                           | 15 |
| <b>Figure S19.</b> $^1\text{H}$ NMR spectrum of <b>1b/2b</b> in $\text{D}_2\text{O}$ (600 MHz).....                                                                                                                                       | 16 |
| <b>Figure S20.</b> $^{13}\text{C}$ NMR spectrum of <b>1b/2b</b> in $\text{D}_2\text{O}$ (151 MHz).....                                                                                                                                    | 16 |
| <b>Figure S21.</b> $^{29}\text{Si}$ NMR spectrum of <b>1b/2b</b> in $\text{D}_2\text{O}$ (119 MHz) .....                                                                                                                                  | 16 |
| <b>Figure S22.</b> From hydrochloride to trifluoroacetate salts. Top: $^1\text{H}$ NMR spectrum of <b>1a/2a</b> mixture in $\text{D}_2\text{O}$ . Bottom: $^1\text{H}$ NMR spectrum of <b>1b/2b</b> mixture in $\text{D}_2\text{O}$ ..... | 17 |
| <b>Figure S23.</b> $^1\text{H}$ flip angle optimization. ....                                                                                                                                                                             | 18 |
| <b>Figure S24.</b> $^1\text{H}$ NMR spectra of <b>1a</b> in DMSO- $d_6$ .....                                                                                                                                                             | 19 |
| <b>Figure S25.</b> $^1\text{H}$ NMR spectra of <b>1a</b> at pH 4.....                                                                                                                                                                     | 20 |
| <b>Figure S26.</b> <b>1a</b> hydrolysis at pH 4 based on $^1\text{H}$ NMR kinetic studies .....                                                                                                                                           | 20 |
| <b>Figure S27.</b> $^1\text{H}$ NMR spectra of <b>1a</b> at pH 7 .....                                                                                                                                                                    | 21 |
| <b>Figure S28.</b> <b>1a</b> hydrolysis at pH 7 based on $^1\text{H}$ NMR kinetic studies .....                                                                                                                                           | 21 |
| <b>Figure S29.</b> $^1\text{H}$ NMR spectra of <b>1a</b> at pH 7.4.....                                                                                                                                                                   | 22 |
| <b>Figure S30.</b> <b>1a</b> hydrolysis at pH 7.4 based on $^1\text{H}$ NMR kinetic studies .....                                                                                                                                         | 22 |
| <b>Figure S31.</b> $^1\text{H}$ NMR spectra of <b>1a</b> at pH 10. Signals from the $\text{CH}_2$ group in gamma position to silicon.....                                                                                                 | 23 |
| <b>Figure S32.</b> <b>1a</b> hydrolysis at pH 10 based on $^1\text{H}$ NMR kinetic studies .....                                                                                                                                          | 24 |
| <b>Figure S33.</b> $^1\text{H}$ NMR spectrum of <b>1a</b> in $\text{D}_2\text{O}$ 0.1% TFA at $t = 0$ .....                                                                                                                               | 24 |
| <b>Figure S34.</b> From monomer to dimer upon lyophilization. ....                                                                                                                                                                        | 25 |
| <b>Figure S35.</b> LC/MS spectrum of <b>4</b> .....                                                                                                                                                                                       | 26 |
| <b>Figure S36.</b> $^1\text{H}$ NMR spectrum of <b>5</b> in DMSO- $d_6$ (400 MHz).....                                                                                                                                                    | 27 |
| <b>Figure S37.</b> $^{13}\text{C}$ NMR spectrum of <b>5</b> in DMSO- $d_6$ (101 MHz).....                                                                                                                                                 | 28 |
| <b>Figure S38.</b> HR-MS analysis of <b>5</b> .....                                                                                                                                                                                       | 29 |
| <b>Figure S39.</b> LC/MS spectrum of <b>6</b> .....                                                                                                                                                                                       | 30 |
| <b>Figure S40.</b> $^1\text{H}$ NMR spectrum of <b>7</b> in DMSO- $d_6$ (400 MHz).....                                                                                                                                                    | 31 |
| <b>Figure S41.</b> $^{13}\text{C}$ NMR spectrum of <b>7</b> in DMSO- $d_6$ (101 MHz) .....                                                                                                                                                | 32 |
| <b>Figure S42.</b> HR-MS analysis of <b>7</b> .....                                                                                                                                                                                       | 33 |
| <b>Figure S43.</b> LC/MS spectrum of <b>8</b> .....                                                                                                                                                                                       | 34 |
| <b>Figure S44.</b> $^1\text{H}$ NMR spectrum of <b>9</b> in DMSO- $d_6$ (400 MHz).....                                                                                                                                                    | 35 |
| <b>Figure S45.</b> $^{13}\text{C}$ NMR spectrum of <b>9</b> in DMSO- $d_6$ (101 MHz).....                                                                                                                                                 | 36 |
| <b>Figure S46.</b> HR-MS analysis of <b>9</b> .....                                                                                                                                                                                       | 37 |

## Supporting information

|                                                                                              |    |
|----------------------------------------------------------------------------------------------|----|
| <b>Figure S47.</b> LC/MS spectrum of <b>10</b> .....                                         | 38 |
| <b>Figure S48.</b> HR-MS analysis of <b>10</b> .....                                         | 39 |
| <b>Figure S49.</b> LC-MS spectrum of <b>11</b> .....                                         | 41 |
| <b>Figure S50.</b> HR-MS analysis of <b>11</b> .....                                         | 42 |
| <b>Figure S51.</b> LC-MS spectrum of <b>12</b> .....                                         | 44 |
| <b>Figure S52.</b> HR-MS spectrum of <b>12</b> .....                                         | 45 |
| <b>Figure S53.</b> Binding of compounds <b>10</b> , <b>11</b> and <b>12</b> .....            | 46 |
| <b>Figure S54.</b> Signaling property of compounds <b>10</b> , <b>11</b> and <b>12</b> ..... | 47 |

## Supporting information

### Abbreviations

ACN, acetonitrile; Alloc, allyloxycarbonyl; Boc, t-butyloxycarbonyl; CM, ChemMatrix; DCM, dichloromethane; DEPT, distortionless enhancement by polarization transfer; DIEA, diisopropylethylamine; DMF, N,N'-dimethylformamide; DMSO, dimethylsulfoxide; DPBS, Dulbecco's phosphate buffered saline; ESI-MS, electrospray ionization mass spectrometry; Fmoc, fluorenylmethoxycarbonyl; GHRP-6, growth hormone releasing hexapeptide; HBTU, **N,N,N',N'-tetramethyl-O-(1H-benzotriazol-1-yl)uronium hexafluorophosphate**; **HFIP, hexafluoroisopropanol**; **HTRF, homogenous time resolved fluorescence**; ICPDMCS, 3-isocyanatopropyltrimethylchlorosilane; IP1, inositol monophosphate; LC/MS, tandem liquid chromatography/ mass spectrometry; MW, micro-wave; NMP, N-methyl-2-pyrrolidone; NMR, nuclear magnetic resonance; pip, piperidine; PS, polystyrene; **RP-HPLC**, reversed phase high performance liquid chromatography; RT, room temperature; SPPS, solid phase peptide synthesis; TFA, trifluoroacetic acid; THF, tetrahydrofuran; TIS, triisopropylsilane; Trt, trityl; UV, ultra-violet. Other abbreviations used were those recommended by the IUPAC-IUB Commission (Eur. J. Biochem. 1984, 138, 9-37).

### Material and Method

All solvents and reagents were used as supplied. Solvents used for LC/MS were of HPLC grade. Dichloromethane (DCM); N,N-dimethylformamide (DMF) were obtained from Carlo Erba. Fmoc amino acid derivatives, [benzotriazol-1-yloxy(dimethylamino)methylidene]-dimethylazanium hexafluorophosphate (HBTU), Fmoc-Rink amide CM resin, 2-chloro chlorotriyl PS resin, were purchased from Iris Biotech (Marktredwitz, Germany). Diisopropylcarbodiimide (DIC), diisopropylethylamine (DIEA), trifluoroacetic acid (TFA) were obtained from Sigma-Aldrich (St. Louis, MO, USA). Hexafluoroisopropanol (HFIP) and triisopropylsilane (TIS) were obtained from Alfa Aesar and Acros respectively. NMR solvents were obtained from Euriso-top.

Samples for LC/MS analyses were prepared in acetonitrile/water (50:50, v/v) mixture, containing 0.1% TFA. The LC/MS system consisted of a Waters Alliance 2695 HPLC, coupled to a Water Micromass ZQ spectrometer (electrospray ionization mode, ESI+). All the analyses were carried out using a Phenomenex Onyx, 25 x 4.6 mm reversed-phase column. A flow rate of 3 mL/min and a gradient of (0-100)% B over 2.5 min were used. Eluent A: water/0.1% HCO<sub>2</sub>H; eluent B: acetonitrile/0.1% HCO<sub>2</sub>H. UV detection was performed at 214 nm. Electrospray mass spectra were acquired at a solvent flow rate of 200 µL/min. Nitrogen was used for both the nebulizing and drying gas. The data were obtained in a scan mode ranging from 100 to 1000 m/z or 250 to 1500 m/z to in 0.7 sec intervals.

High Resolution Mass Spectrometric analyses were performed with a Synapt G2-S (Waters) mass spectrometer fitted with an Electrospray Ionisation source. All measurements were performed in the positive ion mode. Capillary voltage: 1000 V; cone voltage: 30 V; source temperature: 120°C; desolvation temperature: 250°C. The data were obtained in a scan mode ranging from 100 to 1500 m/z.

## Supporting information

### 1,3-bis(3-aminopropyl)tetramethyl disiloxane hydrochloride **1a**

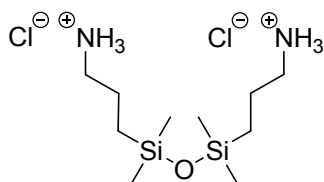

Commercially available 1,3-bis(3-aminopropyl)tetramethyl disiloxane (500  $\mu$ L, 1.8 mmol) was poured into 1 M hydrogen chloride ether solution (7.2 mL, 7.2 mmol, 4 eq) cooled in an ice bath. 1,3-bis(3-aminopropyl)tetramethyl disiloxane hydrochloride precipitated immediately. Diethyl ether was removed under reduced pressure to yield compound **1a** as a white powder (100%).

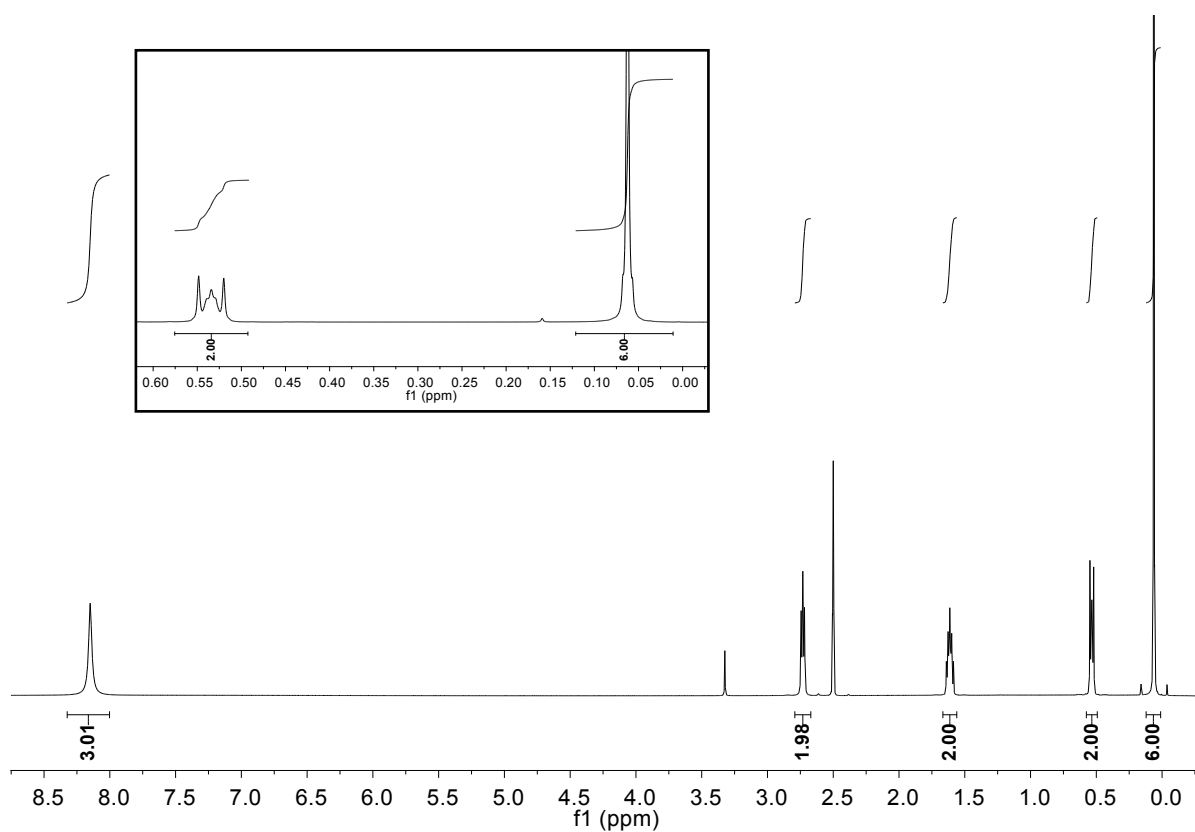

**Figure S1.**  $^1\text{H}$  NMR spectrum of **1a** in  $\text{DMSO-}d_6$  (600 MHz)

## Supporting information

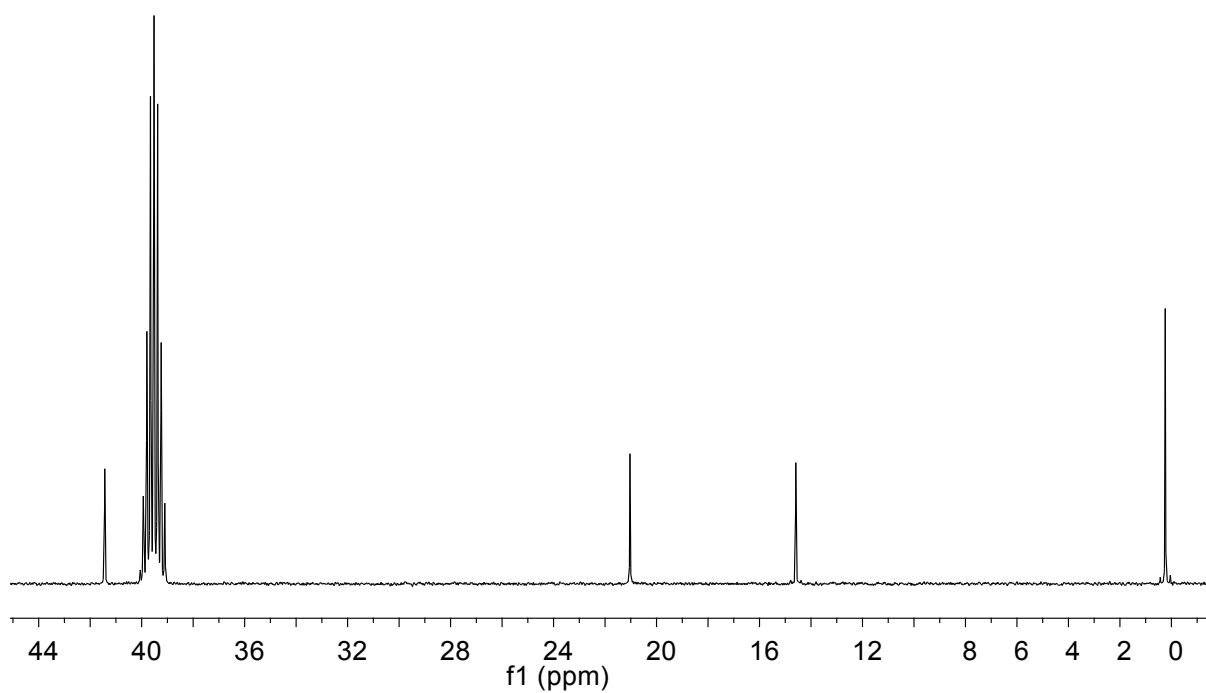

**Figure S2.**  $^{13}\text{C}$  NMR spectrum of **1a** in  $\text{DMSO-}d_6$  (151 MHz)

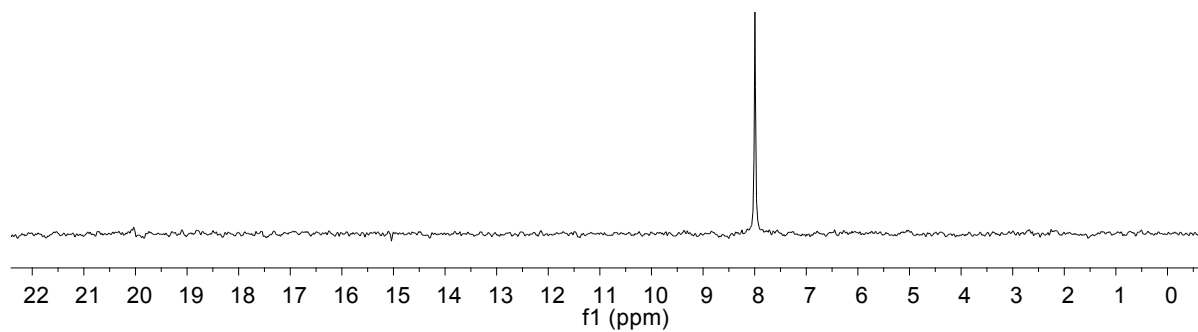

**Figure S3.**  $^{29}\text{Si}$  NMR spectrum of **1a** in  $\text{DMSO-}d_6$  (119 MHz)

## Supporting information

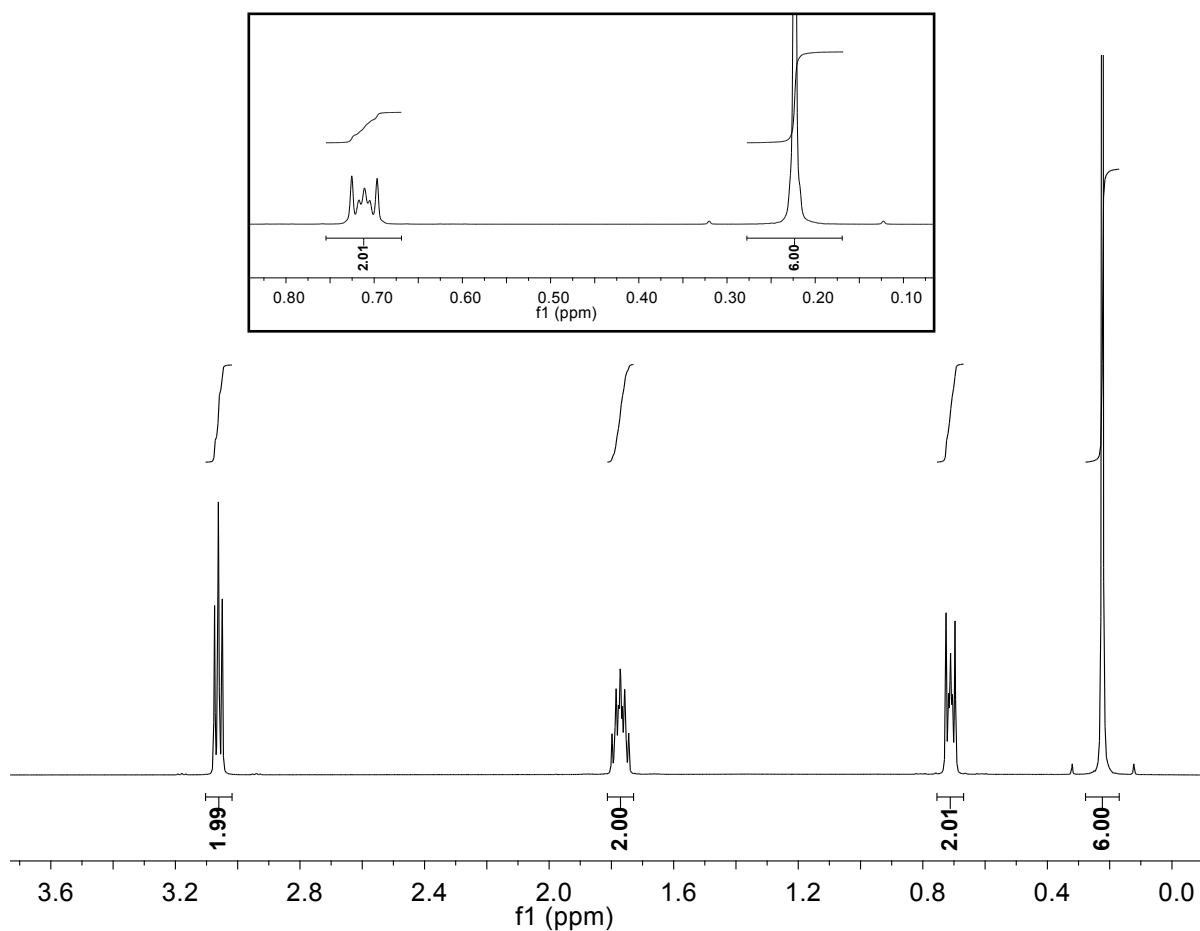

**Figure S4.**  $^1\text{H}$  NMR spectrum of **1a** in  $\text{D}_2\text{O}$  (600 MHz)

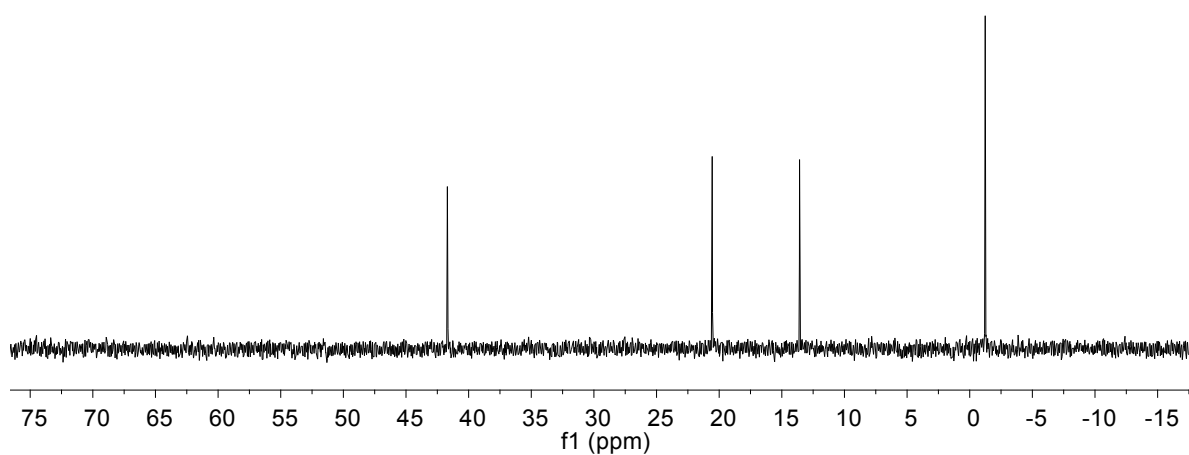

**Figure S5.**  $^{13}\text{C}$  NMR spectrum of **1a** in  $\text{D}_2\text{O}$  (151 MHz)

## Supporting information

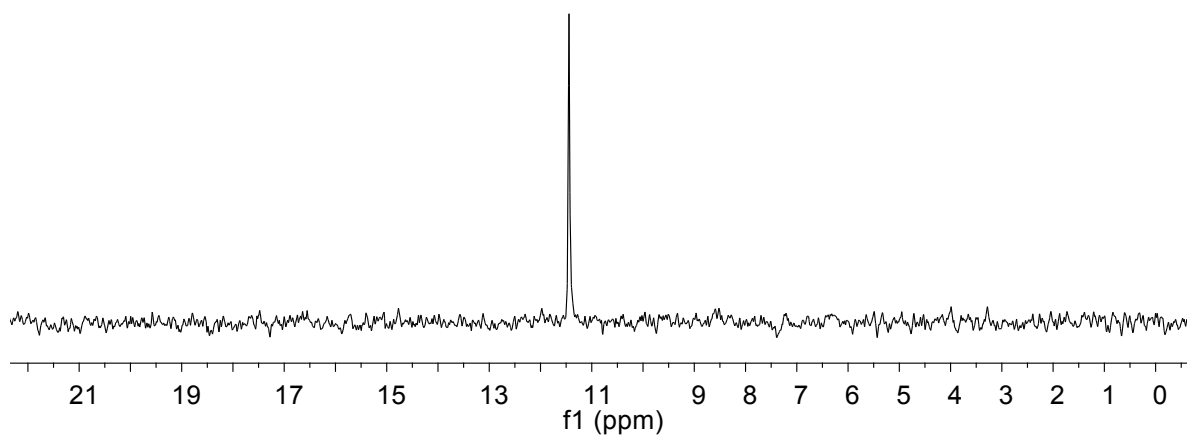

**Figure S6.**  $^{29}\text{Si}$  NMR spectrum of **1a** in  $\text{D}_2\text{O}$  (119 MHz)

### 1,3-bis(3-aminopropyl)tetramethyl disiloxane trifluoroacetate **1b**

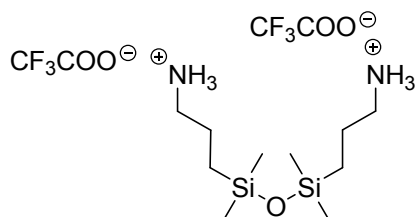

Trifluoroacetic acid (220  $\mu\text{L}$ , 2.89 mmol, 4 eq) was added on 1,3-bis(3-aminopropyl)tetramethyl disiloxane (200  $\mu\text{L}$ , 0.722 mmol) in diethyl ether (2 mL) on an ice bath. Diethyl ether and TFA excess were removed under reduced pressure to yield compound **1b** as a colorless oil (100%).



## Supporting information

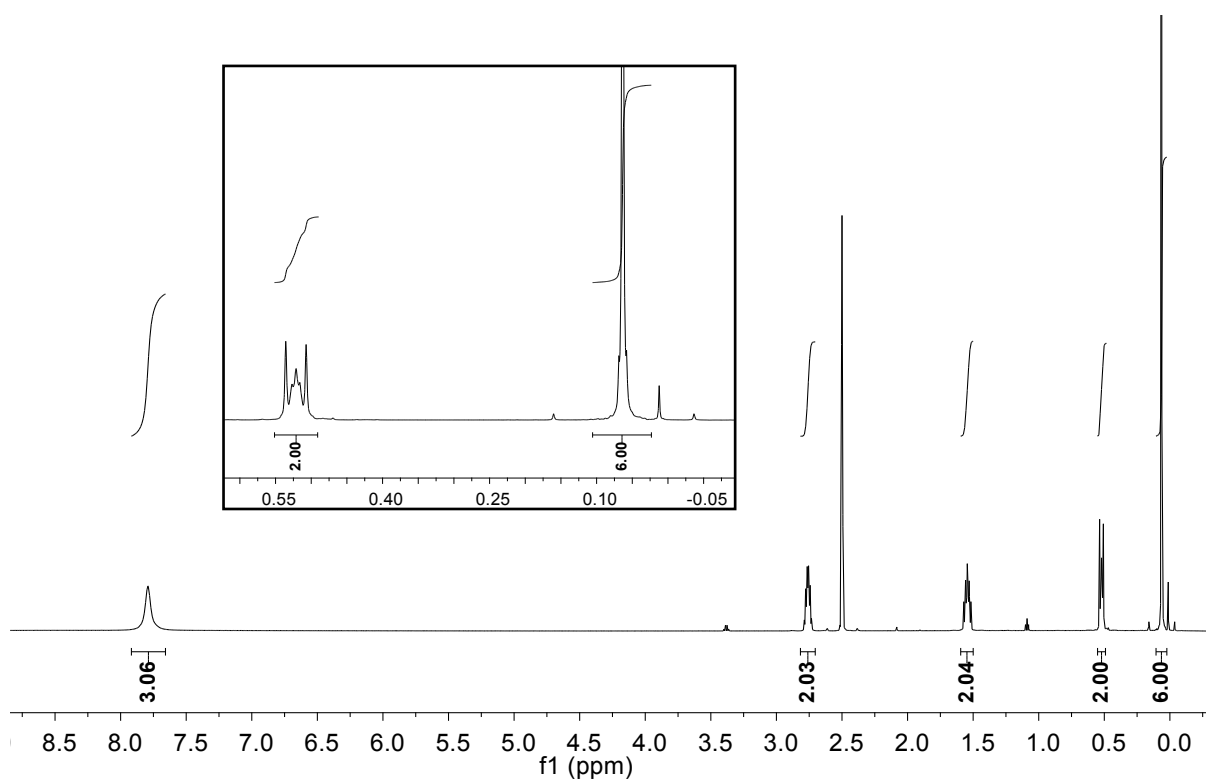

**Figure S7.**  $^1\text{H}$  NMR spectrum of **1b** in  $\text{DMSO-d}_6$  (600 MHz)

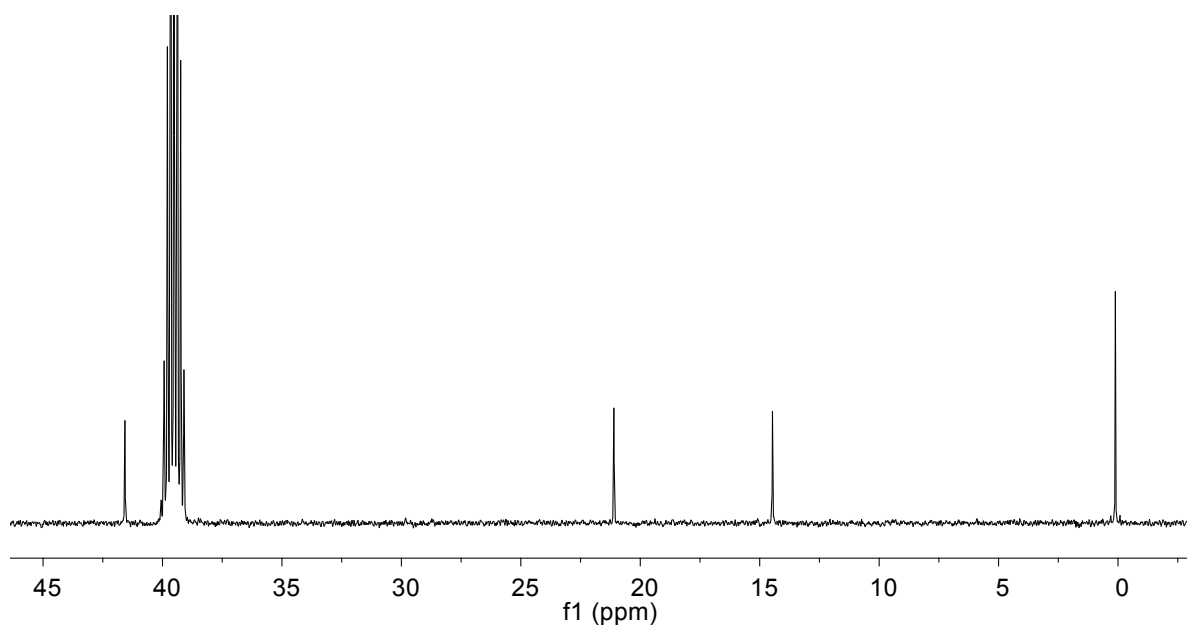

**Figure S8.**  $^{13}\text{C}$  NMR spectrum of **1b** in  $\text{DMSO-d}_6$  (151 MHz)

## Supporting information

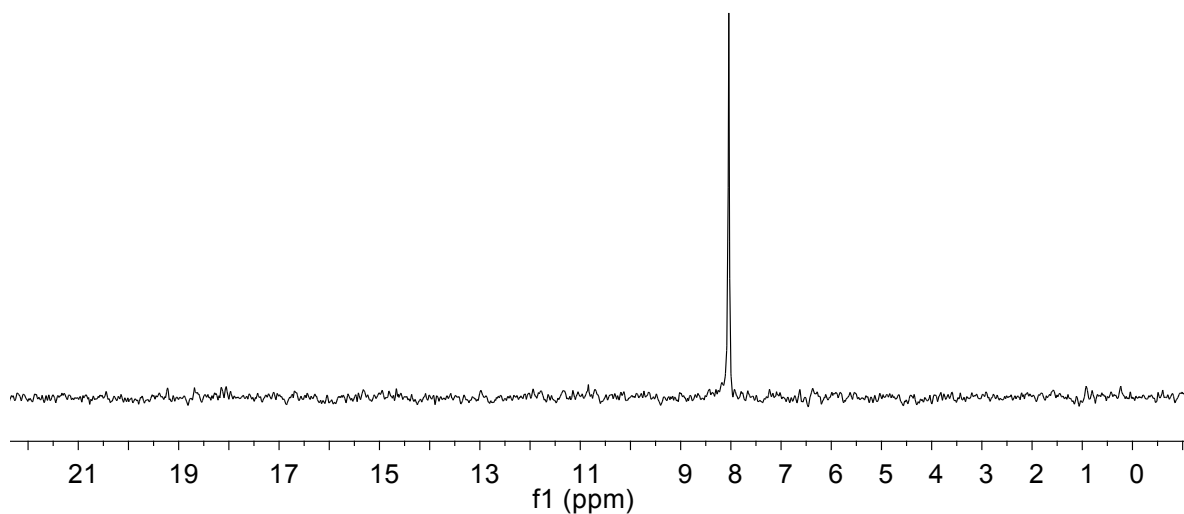

**Figure S9.**  $^{29}\text{Si}$  NMR spectrum of **1b** in  $\text{DMSO-d}_6$  (119 MHz)

### (3-aminopropyl)dimethylsilanol hydrochloride **2a**

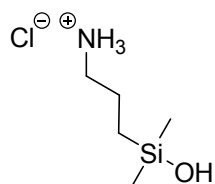

On the one hand, DCI 35% in  $\text{D}_2\text{O}$  (6.00  $\mu\text{L}$ ) were added to **1a** (20 mg) in  $\text{DMSO-d}_6$  (600  $\mu\text{L}$ ) to trigger **1a** hydrolysis into **2a**. The **1a/2a** mixture in  $\text{DMSO-d}_6$  was analyzed by NMR.

## Supporting information

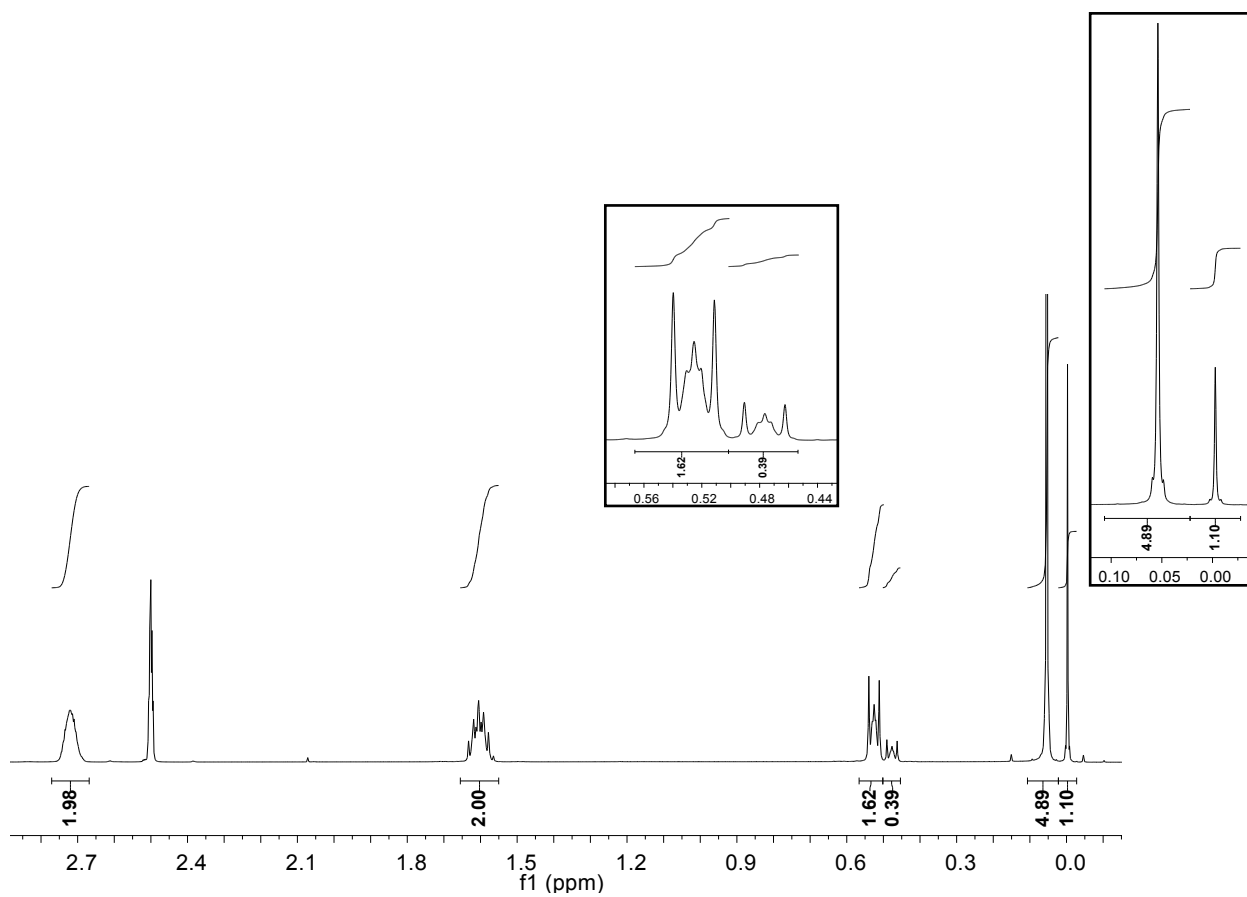

**Figure S10.**  $^1\text{H}$  NMR spectrum of **1a/2a** in  $\text{DMSO-d}_6$  (600 MHz)

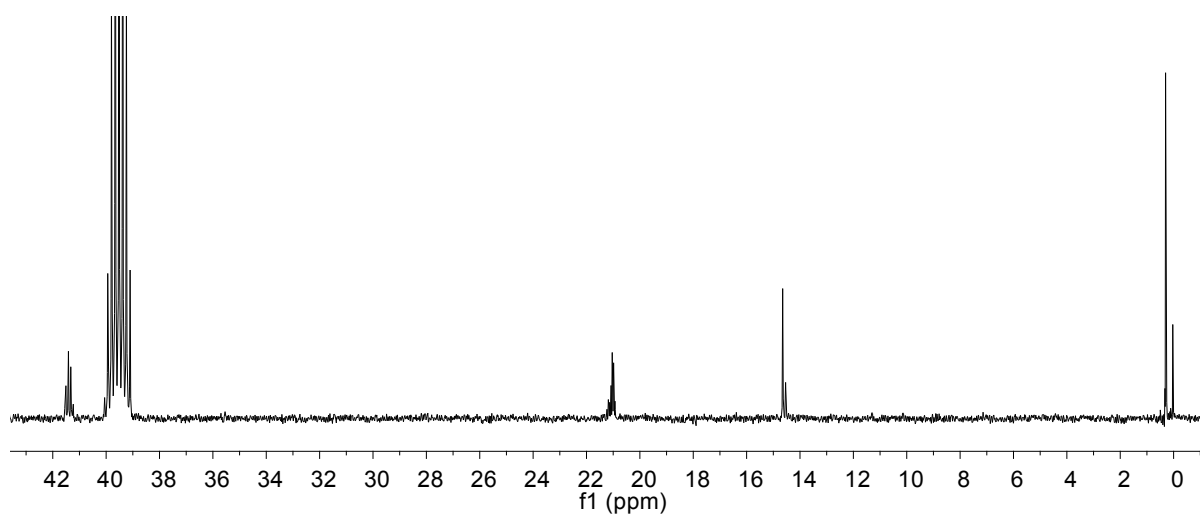

**Figure S11.**  $^{13}\text{C}$  NMR spectrum of **1a/2a** in  $\text{DMSO-d}_6$  (151 MHz)

## Supporting information

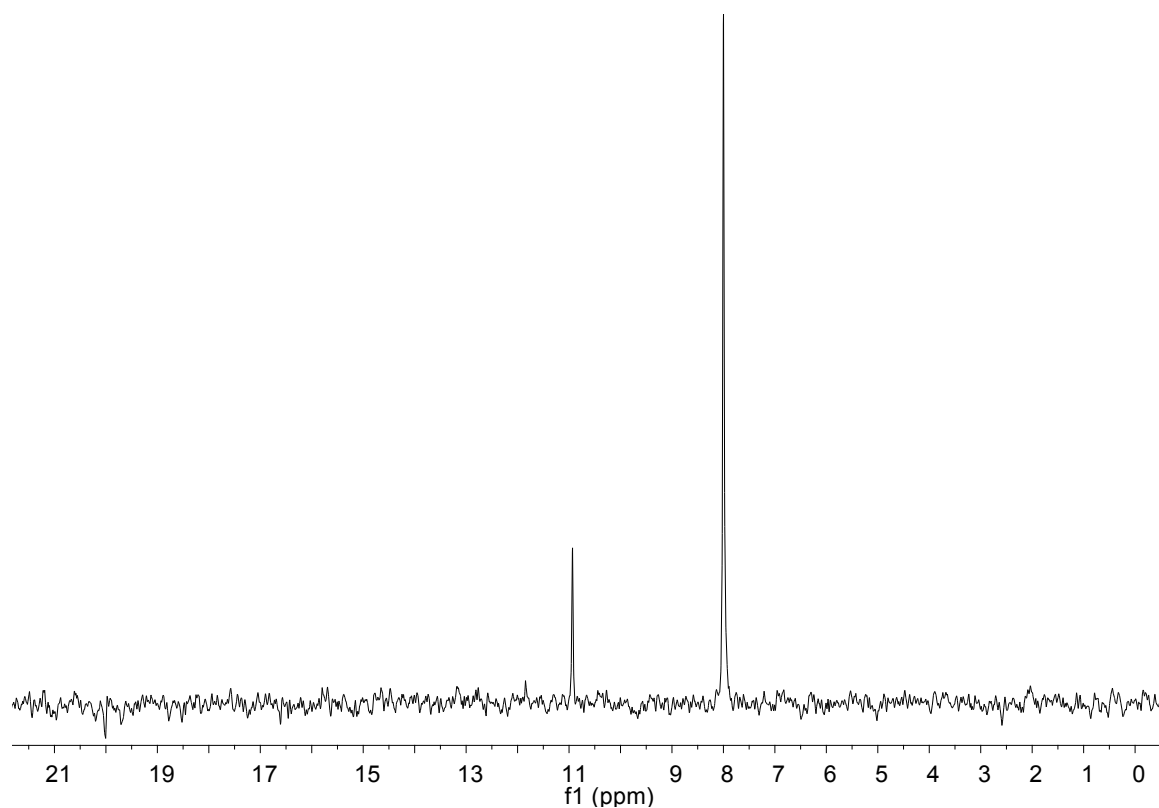

**Figure S12.**  $^{29}\text{Si}$  NMR spectrum of **1a/2a** in  $\text{DMSO-d}_6$  (119 MHz)

On the other hand, 1,3-bis(3-aminopropyl)tetramethyl disiloxane hydrochloride **1a** (20 mg) was solubilized in  $\text{D}_2\text{O}$  (600  $\mu\text{L}$ ) and the solution was left aside for 8 weeks to allow **1a** hydrolysis into **2a**. **2a** solution in  $\text{D}_2\text{O}$  was analyzed by NMR. Traces of **1a** are still visible on NMR spectra.

## Supporting information

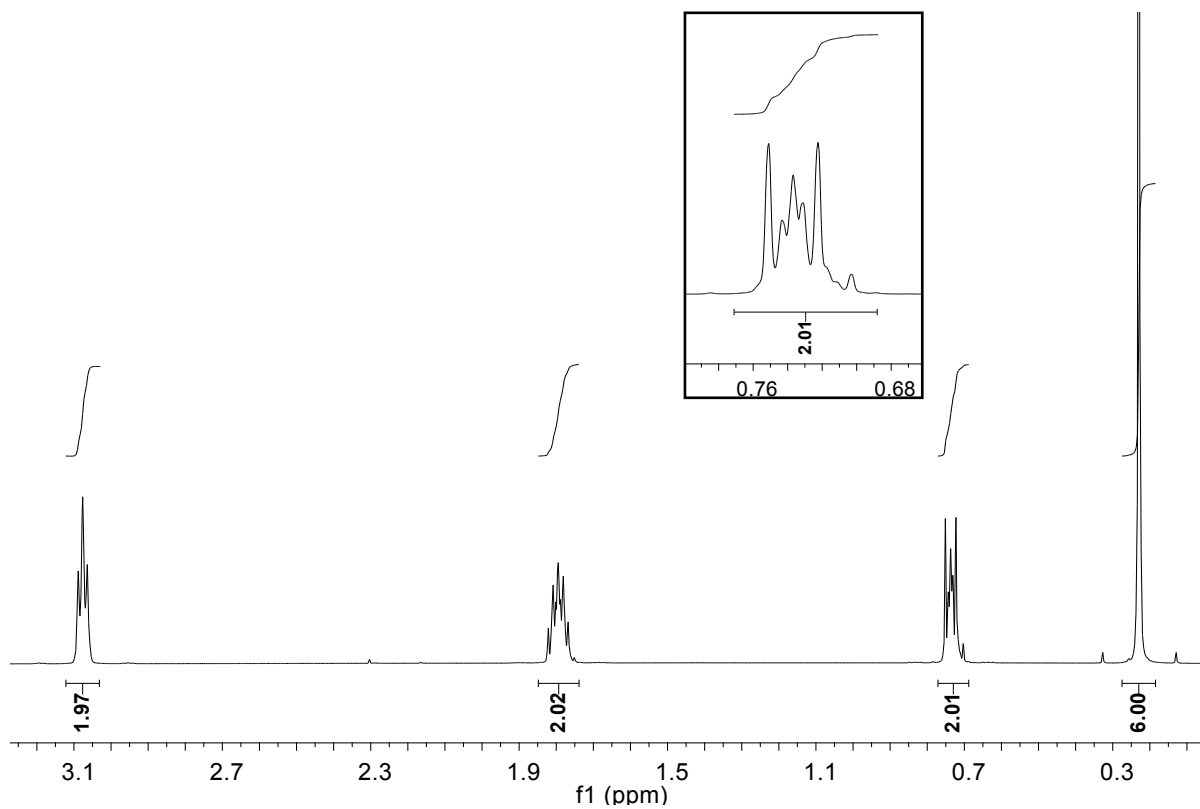

**Figure S13.**  $^1\text{H}$  NMR spectrum of **2a** in  $\text{D}_2\text{O}$  (600 MHz)

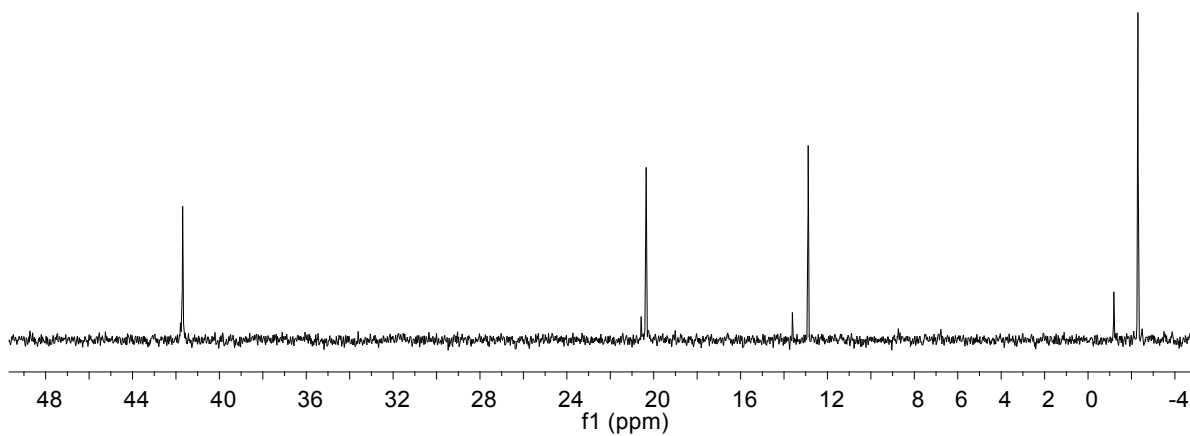

**Figure S14.**  $^{13}\text{C}$  NMR spectrum of **2a** in  $\text{D}_2\text{O}$  (151 MHz)

## Supporting information

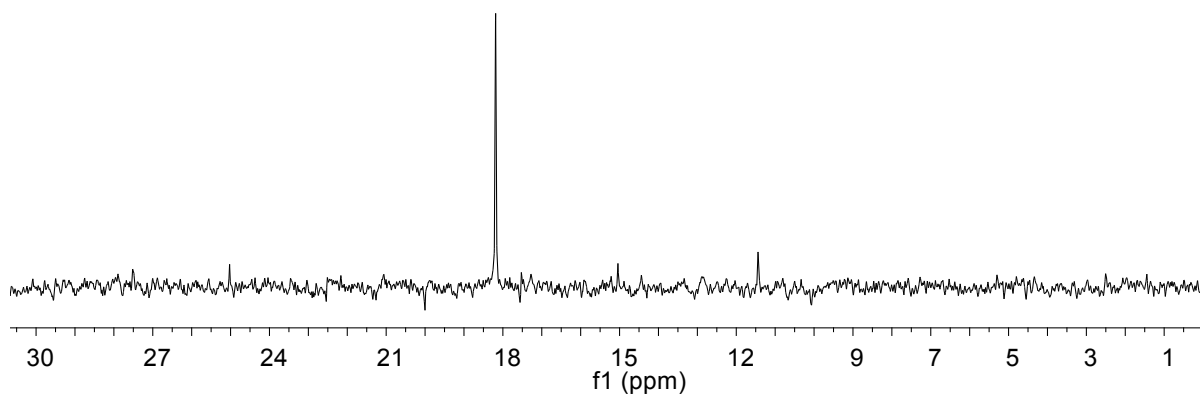

**Figure S15.**  $^{29}\text{Si}$  NMR spectrum of **2a** in  $\text{D}_2\text{O}$  (119 MHz)

### (3-aminopropyl)dimethylsilanol trifluoroacetate **2b**

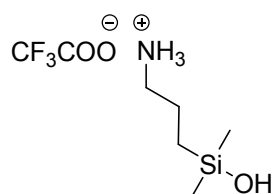

On the one hand, 3-bis(3-aminopropyl)tetramethyl disiloxane trifluoroacetate **1b** (20 mg) was dissolved in  $\text{DMSO-d}_6$  (600  $\mu\text{L}$ ) and the solution was left aside for 5 weeks to allow **1b** hydrolysis into **2b**. Then the mixture **1b/2b** in  $\text{DMSO-d}_6$  was analyzed by NMR.

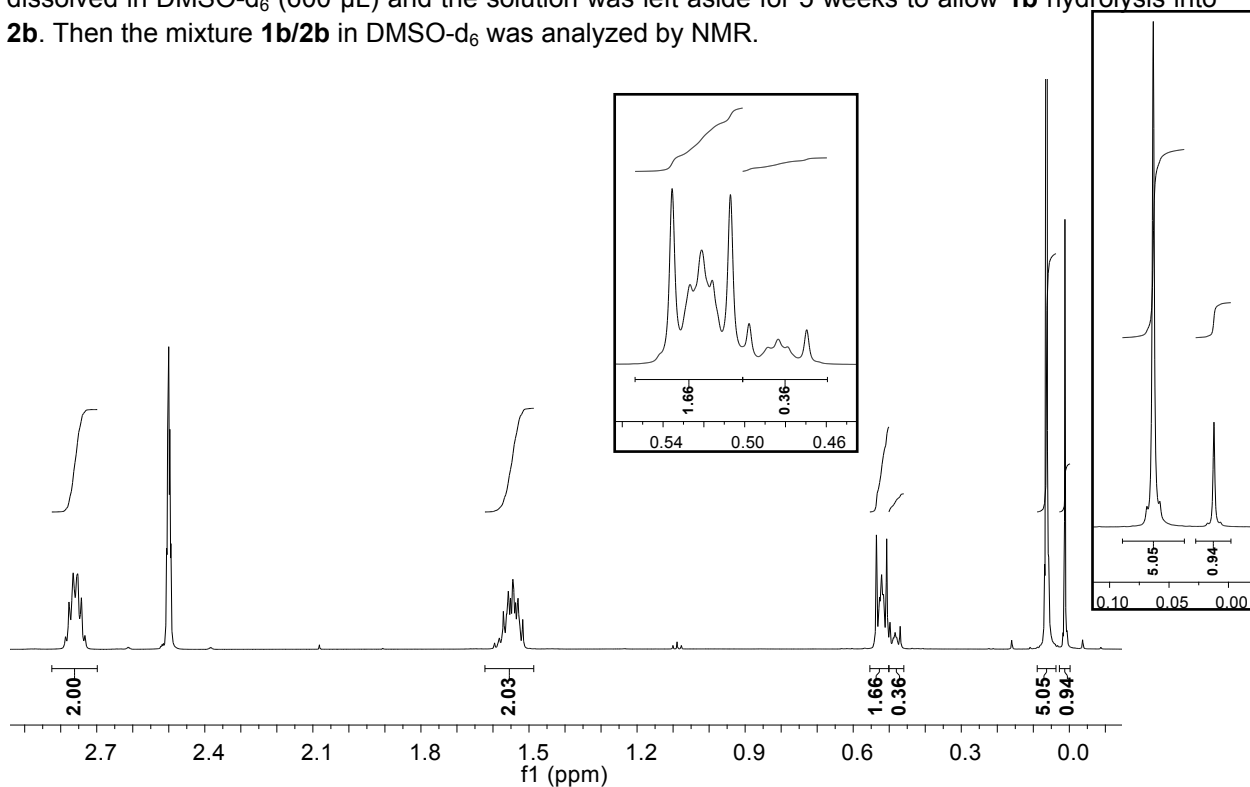

**Figure S16.**  $^1\text{H}$  NMR spectrum of **1b/2b** in  $\text{DMSO-d}_6$  (600 MHz)

## Supporting information

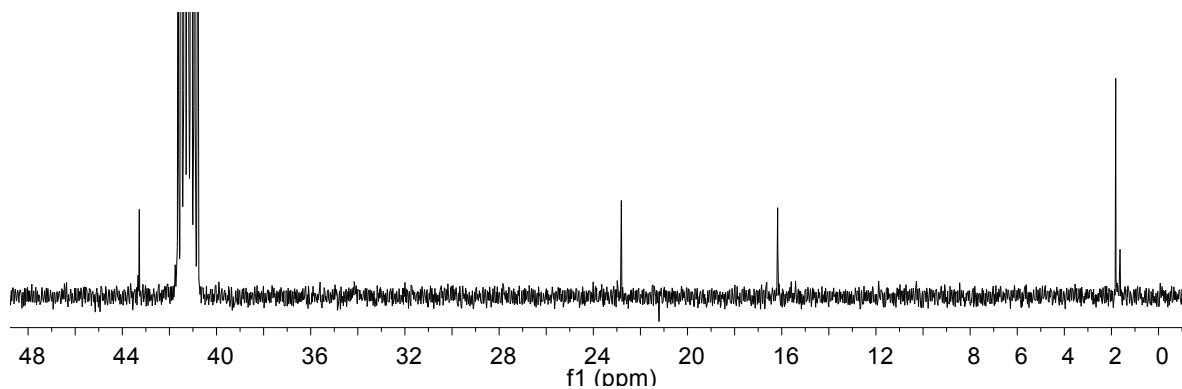

**Figure S17.**  $^{13}\text{C}$  NMR spectrum of **1b/2b** in  $\text{DMSO-d}_6$  (151 MHz)

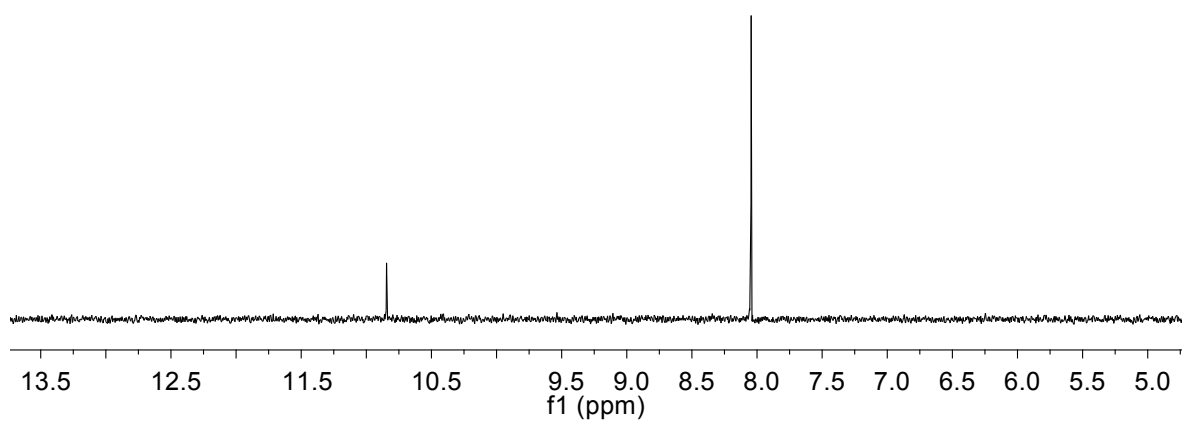

**Figure S18.**  $^{29}\text{Si}$  NMR spectrum of **1b/2b** in  $\text{DMSO-d}_6$  (119 MHz)

On the other hand, 3-bis(3-aminopropyl)tetramethyl disiloxane trifluoroacetate **1b** (20 mg) was dissolved in  $\text{D}_2\text{O}$  (600  $\mu\text{L}$ ). **1b** hydrolysis into **2b** occurred. The mixture **1b/2b** in  $\text{D}_2\text{O}$  was analyzed by NMR.

## Supporting information

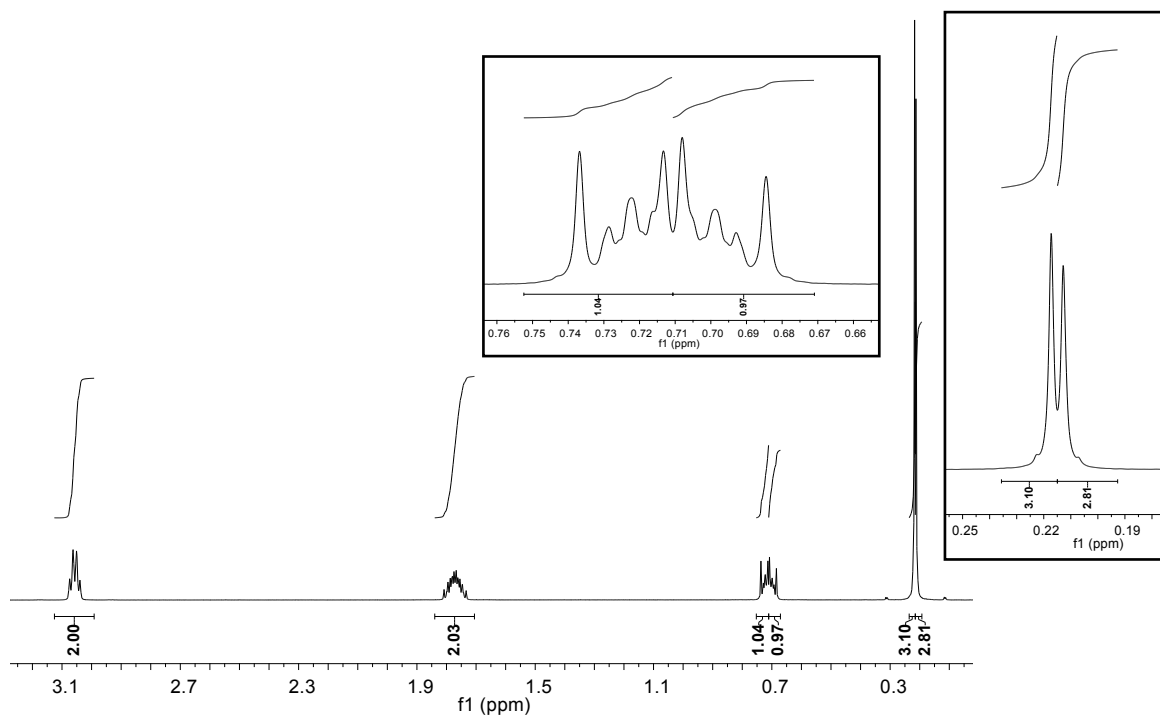

**Figure S19.**  $^1\text{H}$  NMR spectrum of **1b/2b** in  $\text{D}_2\text{O}$  (600 MHz)

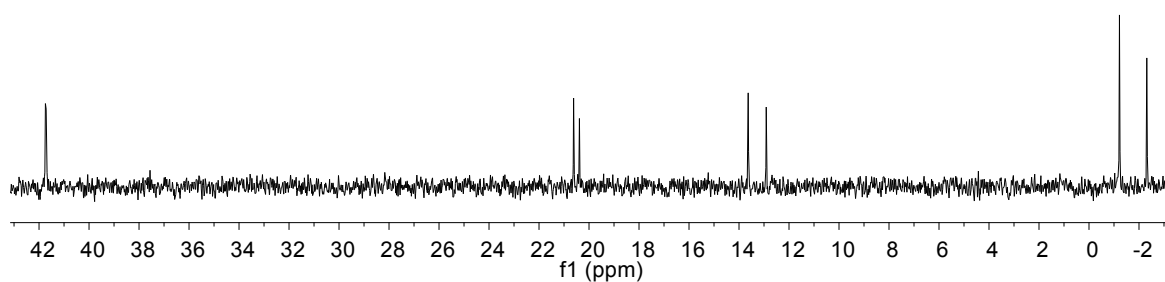

**Figure S20.**  $^{13}\text{C}$  NMR spectrum of **1b/2b** in  $\text{D}_2\text{O}$  (151 MHz)

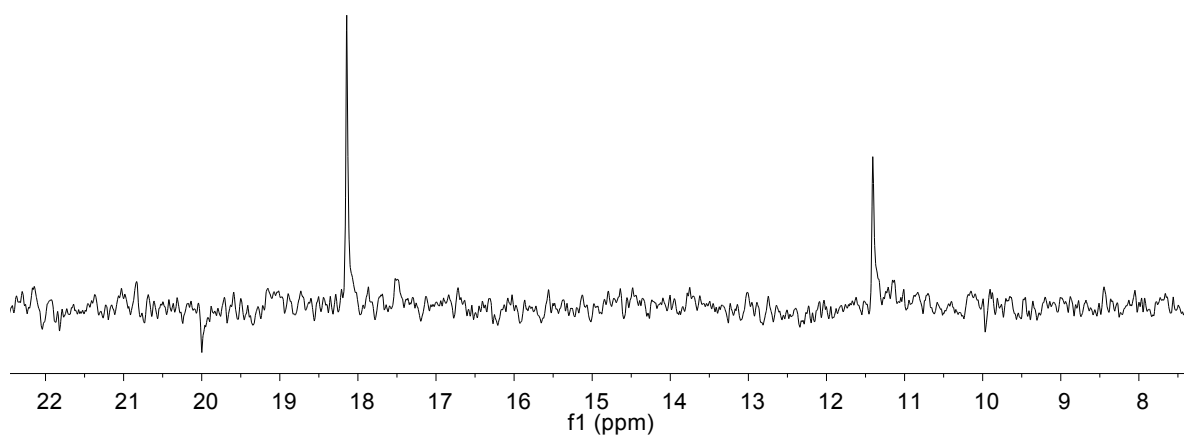

**Figure S21.**  $^{29}\text{Si}$  NMR spectrum of **1b/2b** in  $\text{D}_2\text{O}$  (119 MHz)



## Supporting information

### Counter-ion effect on NMR signals

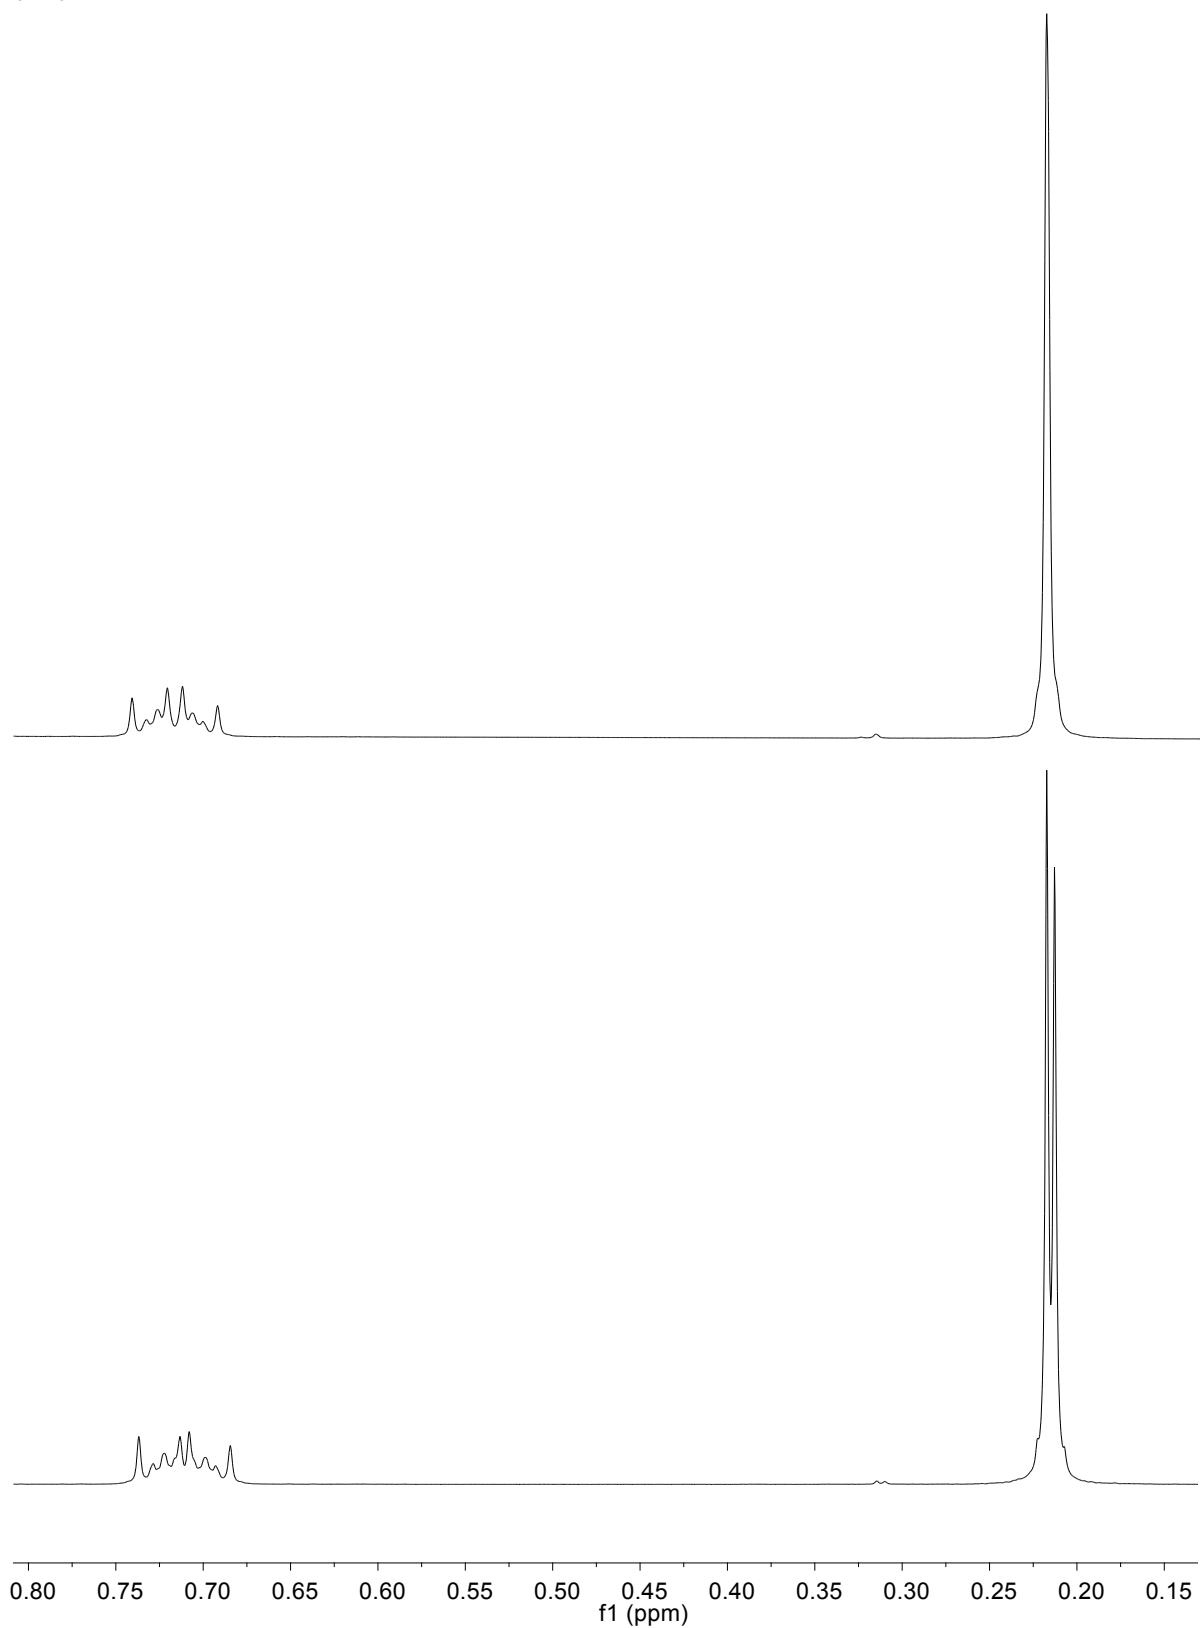

**Figure S22.** From hydrochloride to trifluoroacetate salts. Top:  $^1\text{H}$  NMR spectrum of **1a/2a** mixture in  $\text{D}_2\text{O}$ . Bottom:  $^1\text{H}$  NMR spectrum of **1b/2b** mixture in  $\text{D}_2\text{O}$ .

## Supporting information

### DEPT $^{29}\text{Si}$ sequence optimization

In order to decrease the experiment time, we used a DEPT  $^{29}\text{Si}$  sequence, with a relaxation delay of 2 seconds, to take advantage of the polarization transfer from hydrogens of methylene in the alpha position to the silicon atom. An optimization was made on this sequence, where the last  $^1\text{H}$  flip angle was moved from  $17^\circ$  to  $45^\circ$  (Figure S23). The results showed a factor of 2 gain in favor of the angle of  $24^\circ$  compared to the standard DEPT of  $45^\circ$ .

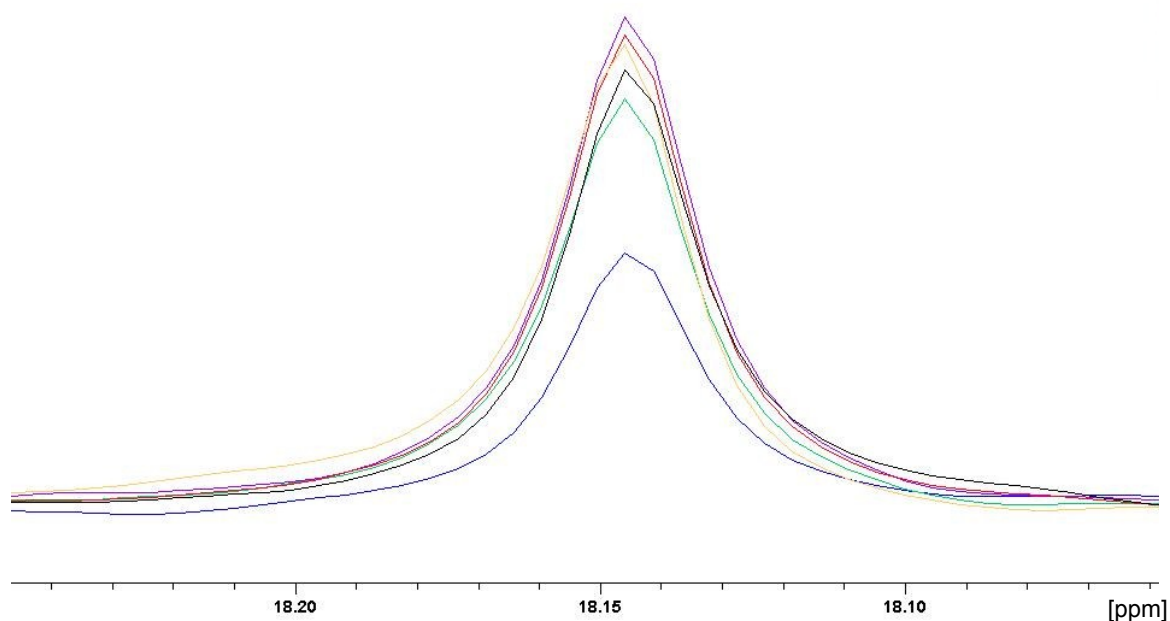

**Figure S23.**  $^1\text{H}$  flip angle optimization.  $^1\text{H}$  flip angle was moved from  $17^\circ$  to  $45^\circ$ : blue  $45^\circ$ , green  $35^\circ$ , purple  $24^\circ$ , red  $21^\circ$ , orange  $19.5^\circ$ , black  $17^\circ$

## Supporting information

### Stability studies of the siloxane bond in different solutions by $^1\text{H-NMR}$

$t = 0$  min corresponds to the dissolution of 1,3-bis(3-aminopropyl)tetramethyl disiloxane hydrochloride **1a** (20 mg) in  $\text{DMSO-d}_6$  or in  $\text{D}_2\text{O}$ -containing buffer that yields a solution at the desired pH. pH were adjusted in advance with Dulbecco's phosphate buffered saline, HCl or NaOH aqueous solutions on blank samples. Dimer percent was reported as a function of time based on the integration of  $^1\text{H}$  signals from the  $-\text{CH}_2\text{Si}$  group of monomer and dimer.

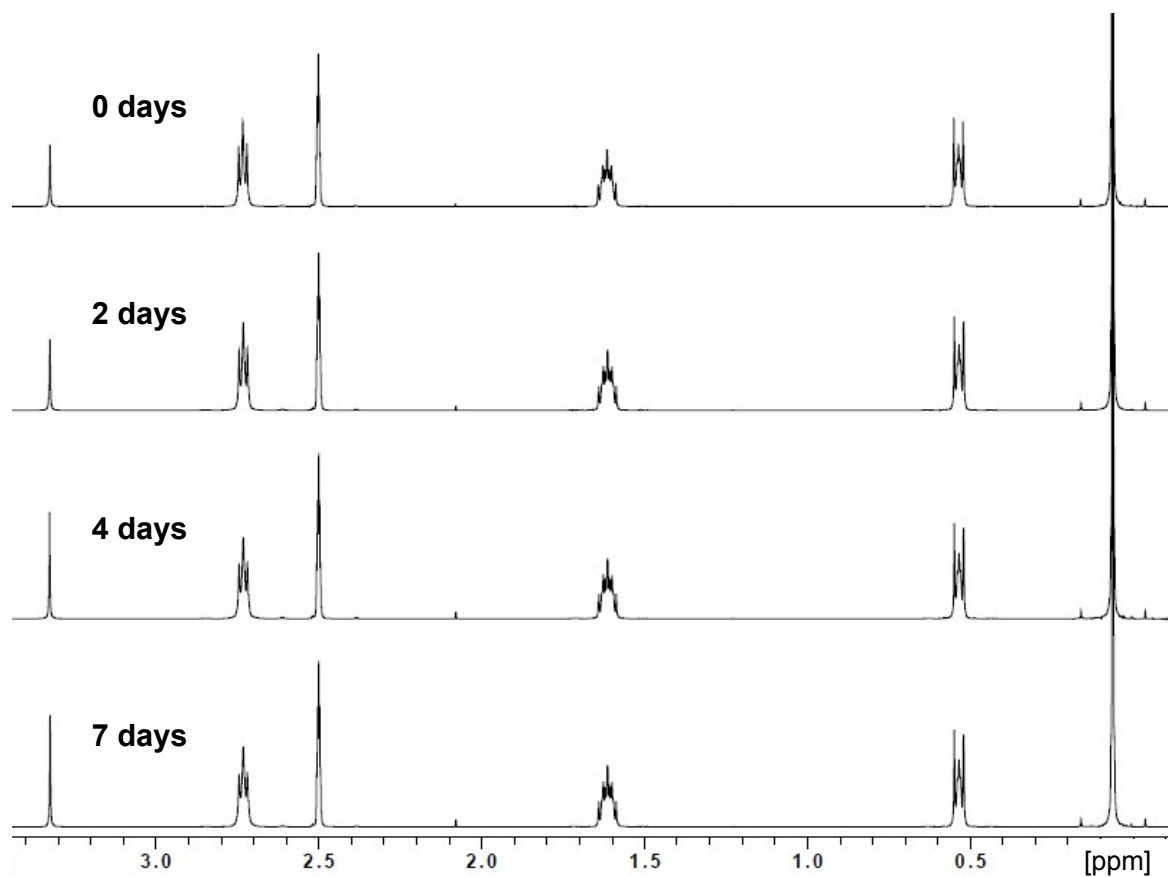

**Figure S24.**  $^1\text{H}$  NMR spectra of **1a** in  $\text{DMSO-d}_6$

## Supporting information

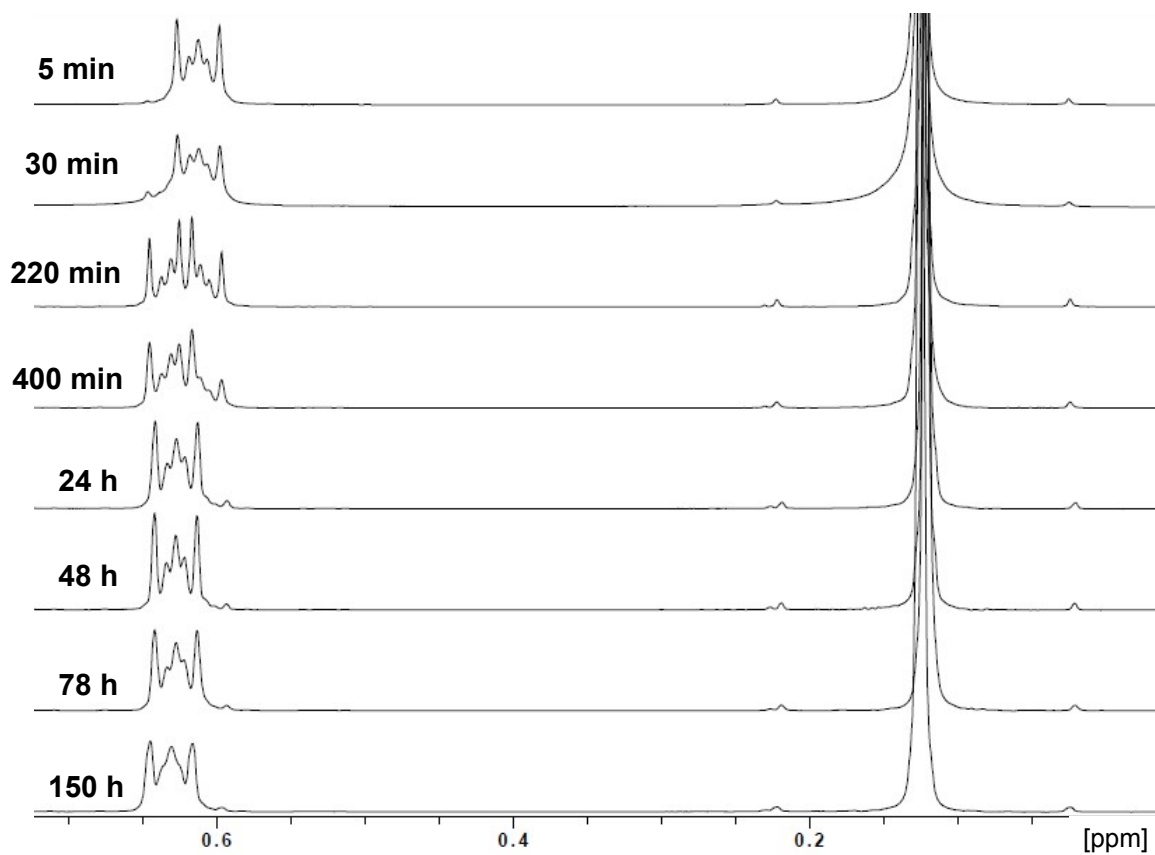

**Figure S25.**  $^1\text{H}$  NMR spectra of **1a** at pH 4

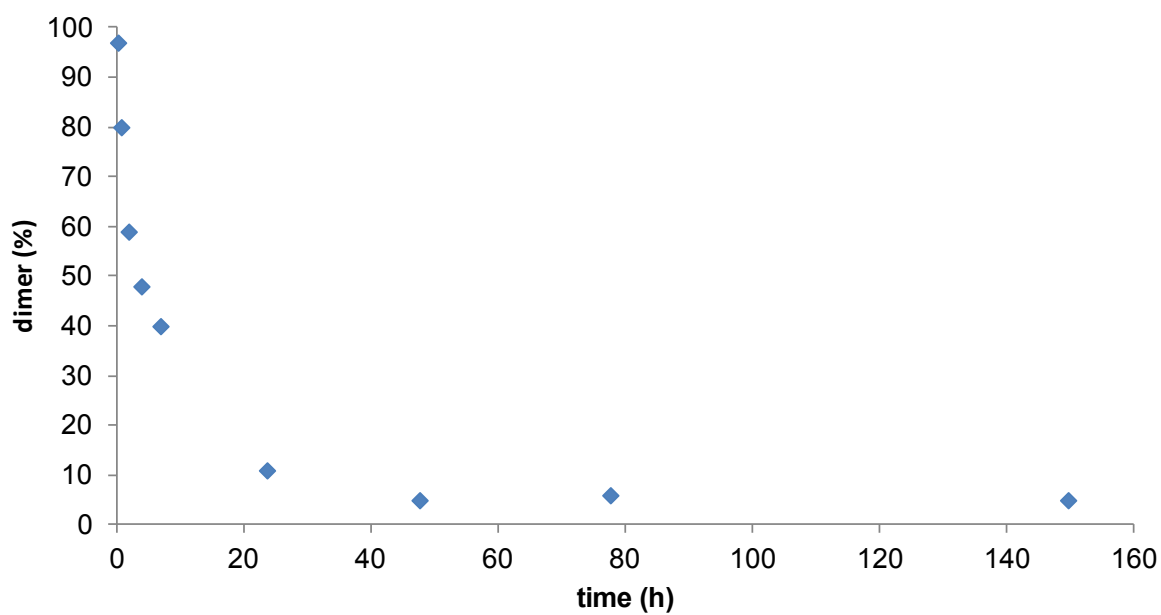

**Figure S26.** **1a** hydrolysis at pH 4 based on  $^1\text{H}$  NMR kinetic studies

## Supporting information

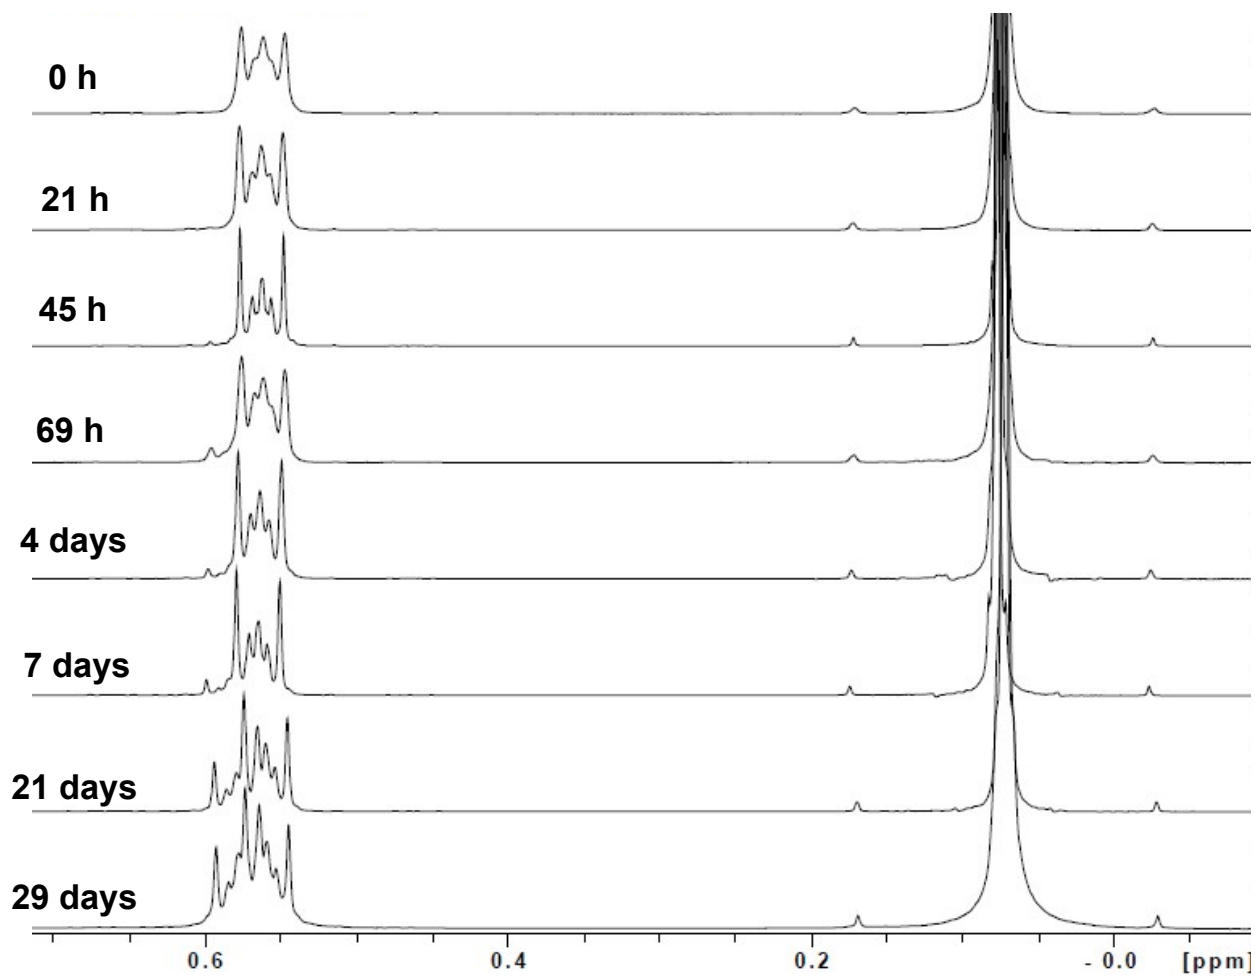

Figure S27.  $^1\text{H}$  NMR spectra of **1a** at pH 7

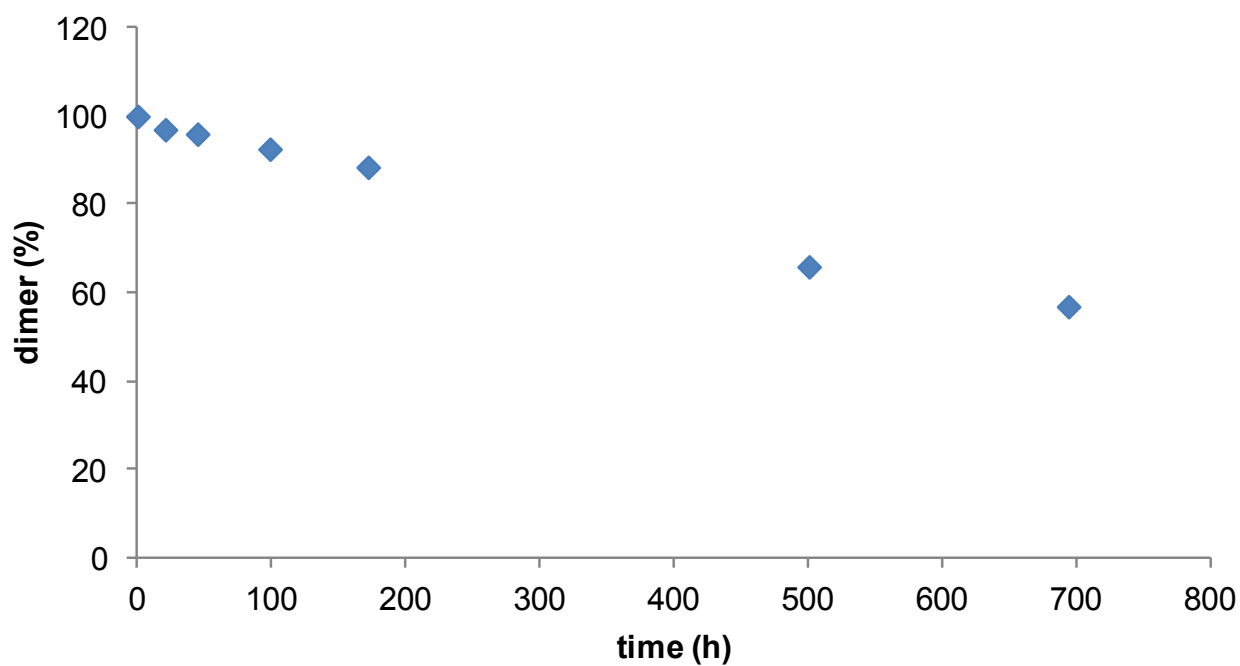

Figure S28. **1a** hydrolysis at pH 7 based on  $^1\text{H}$  NMR kinetic studies

## Supporting information

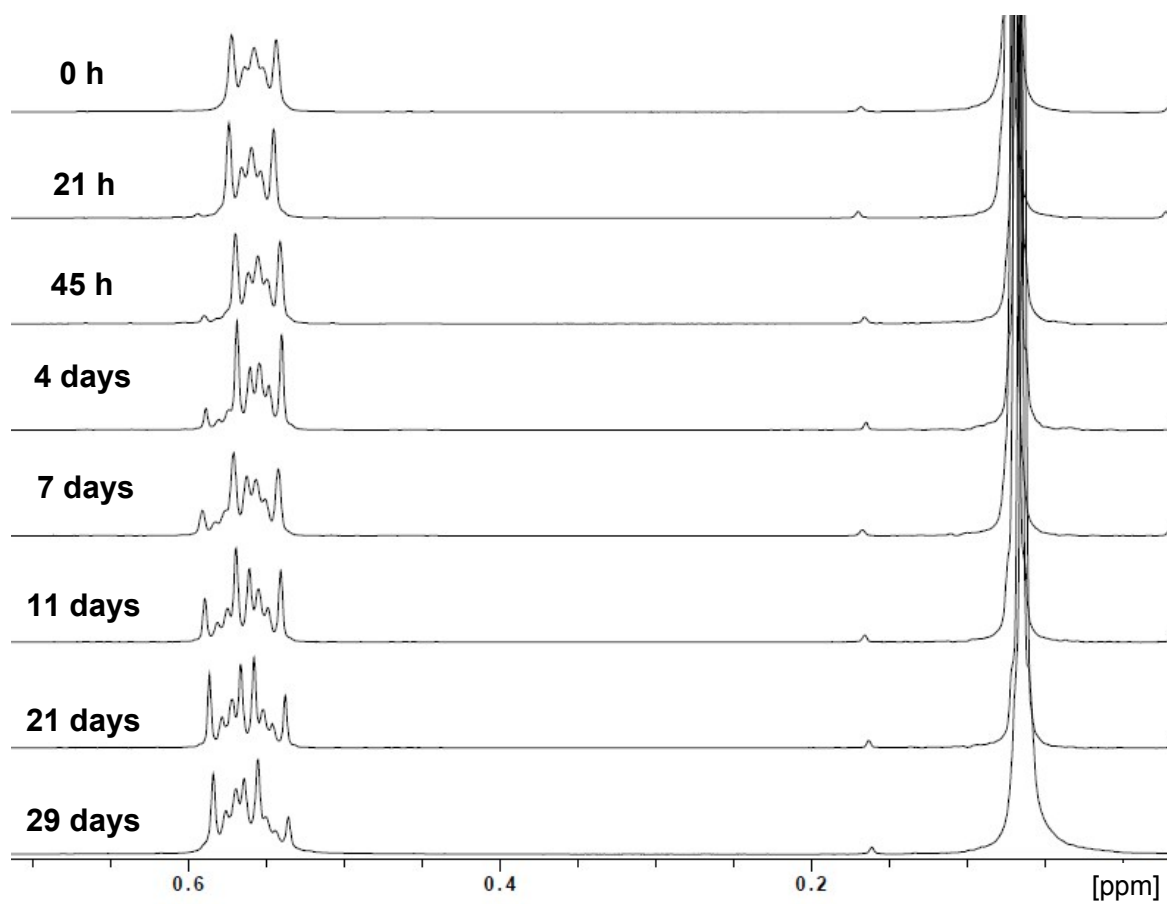

Figure S29.  $^1\text{H}$  NMR spectra of **1a** at pH 7.4

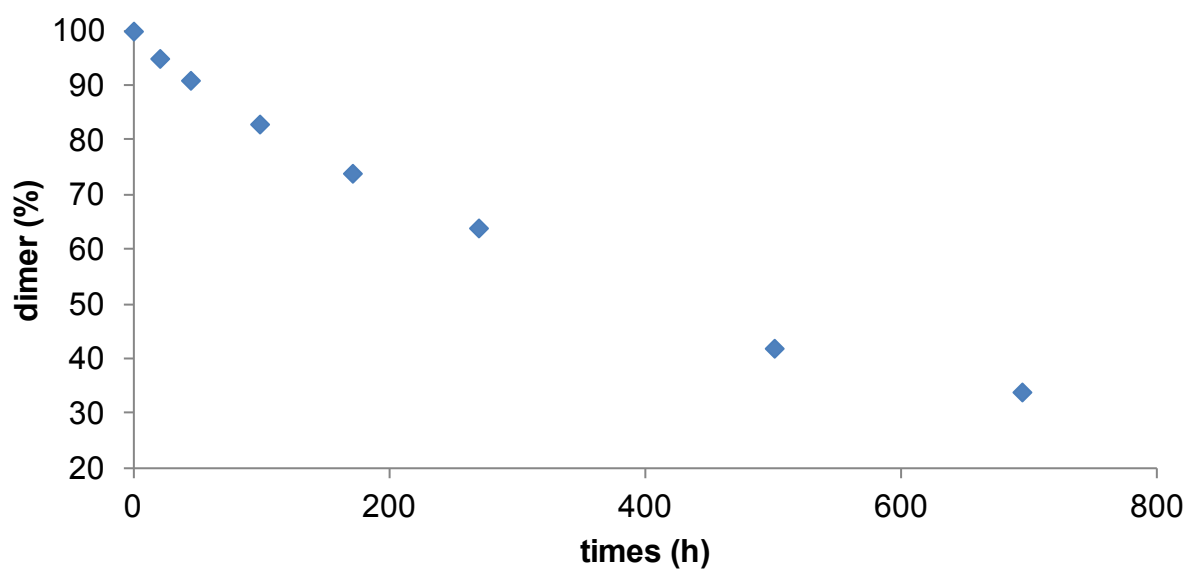

Figure S30. **1a** hydrolysis at pH 7.4 based on  $^1\text{H}$  NMR kinetic studies

## Supporting information

We focused our attention on  $^1\text{H}$  signals from  $-\text{CH}_2\text{Si}$  and  $\text{CH}_3\text{Si}$  because they are the farthest signals from the peptide sequence in hybrid peptide displaying the dimethylpropylsiloxane dimerization arm. As a consequence, very few differences in chemical shifts and signal shapes are expected when changing the peptide sequence. Thus, NMR studies on the 1,3-bis(3-aminopropyl)tetramethyl disiloxane model can be generalized to hybrid peptides. In addition, these signals appear in a chemical shift area completely different from peptide signals which makes them easily identifiable and integrable. However, the methylene group in gamma position to the silicon is also a problem for the determination of monomer/dimer ratio (figure S31)

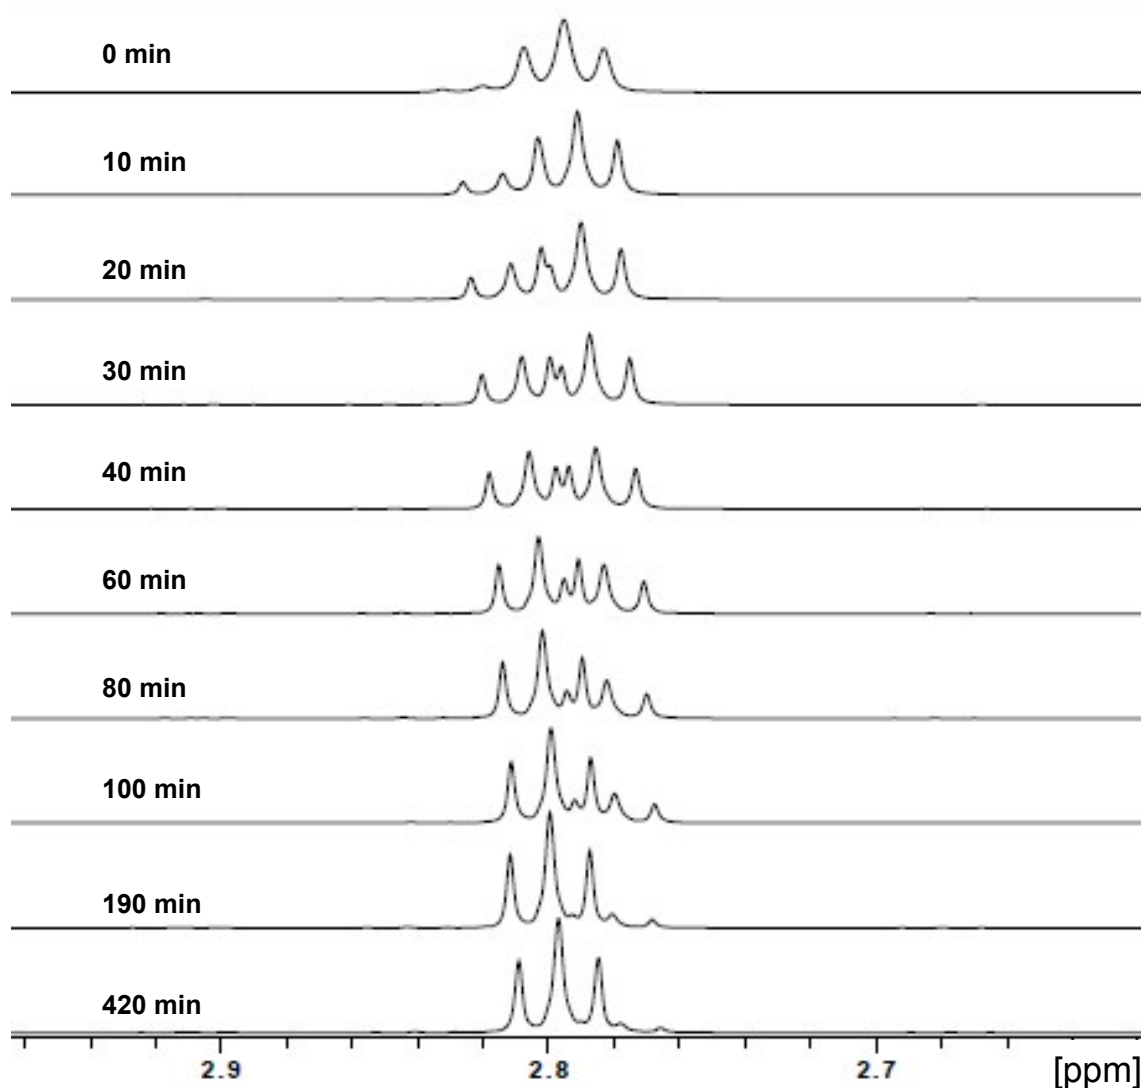

**Figure S31.**  $^1\text{H}$  NMR spectra of **1a** at pH 10. Signals from the  $\text{CH}_2$  group in gamma position to silicon

## Supporting information

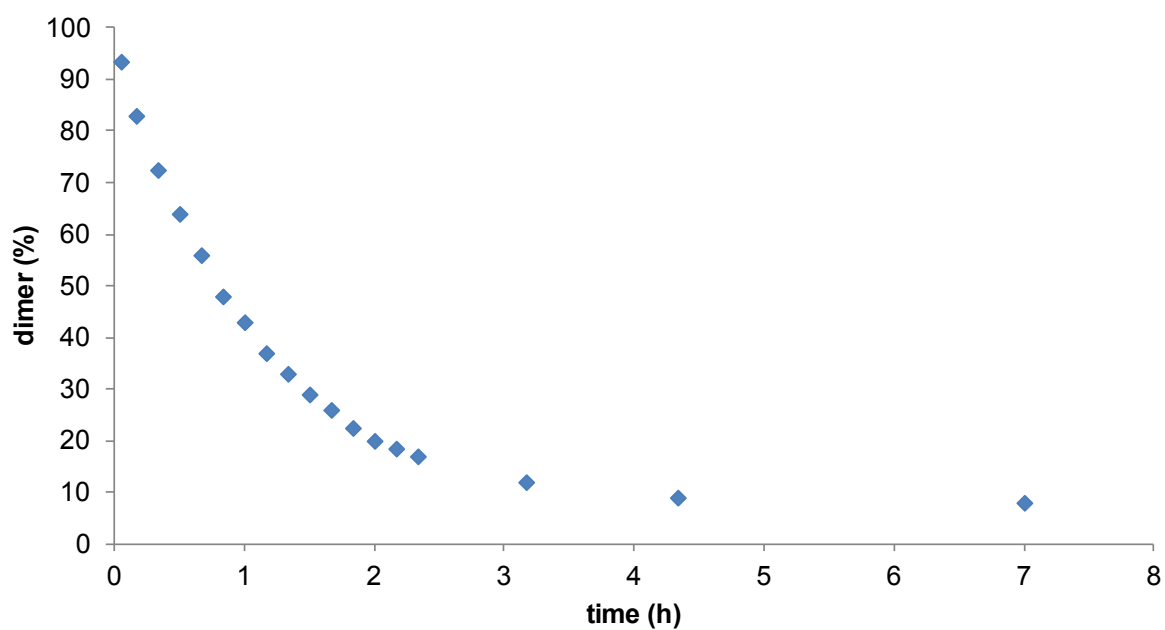

**Figure S32.** *1a* hydrolysis at pH 10 based on  $^1\text{H}$  NMR kinetic studies

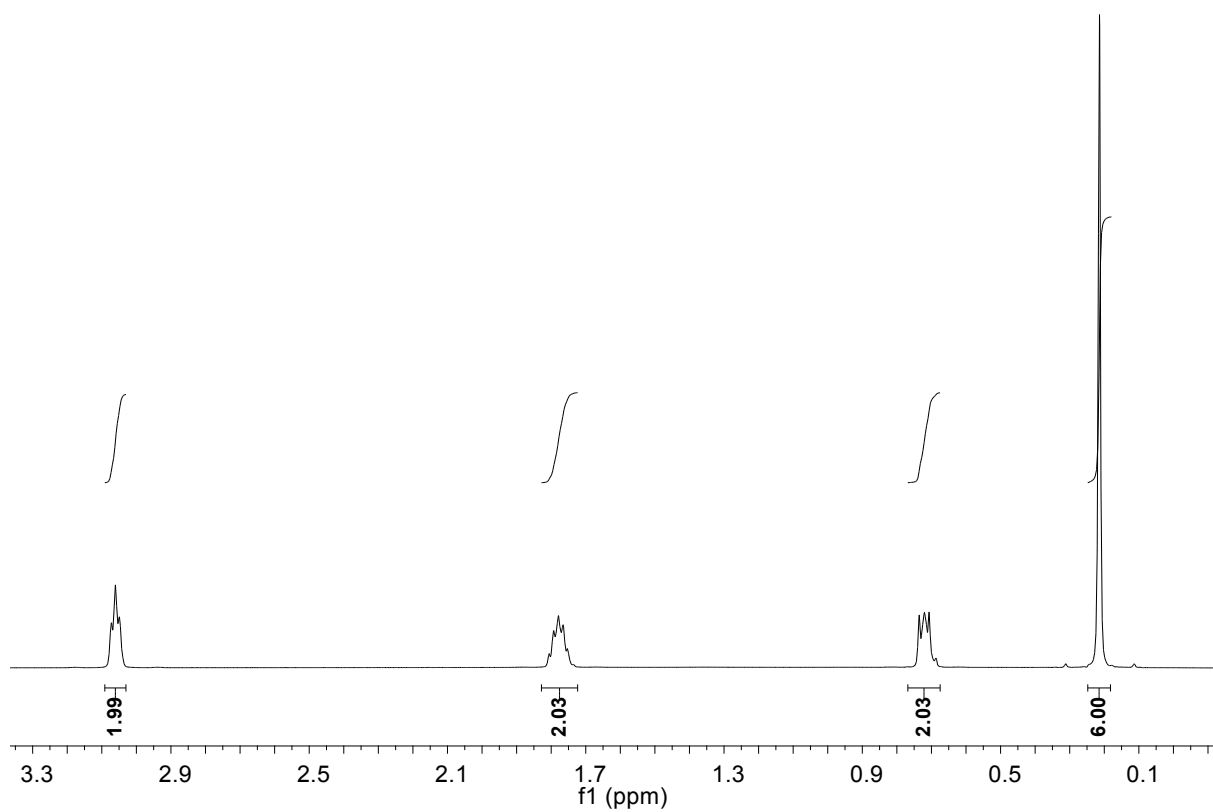

**Figure S33.**  $^1\text{H}$  NMR spectrum of **1a** in  $\text{D}_2\text{O}$  0.1% TFA at  $t = 0$ . Hydrolysis occurred immediately. Signals correspond to monomer **2a**.



## Supporting information

### Silanol condensation upon lyophilization

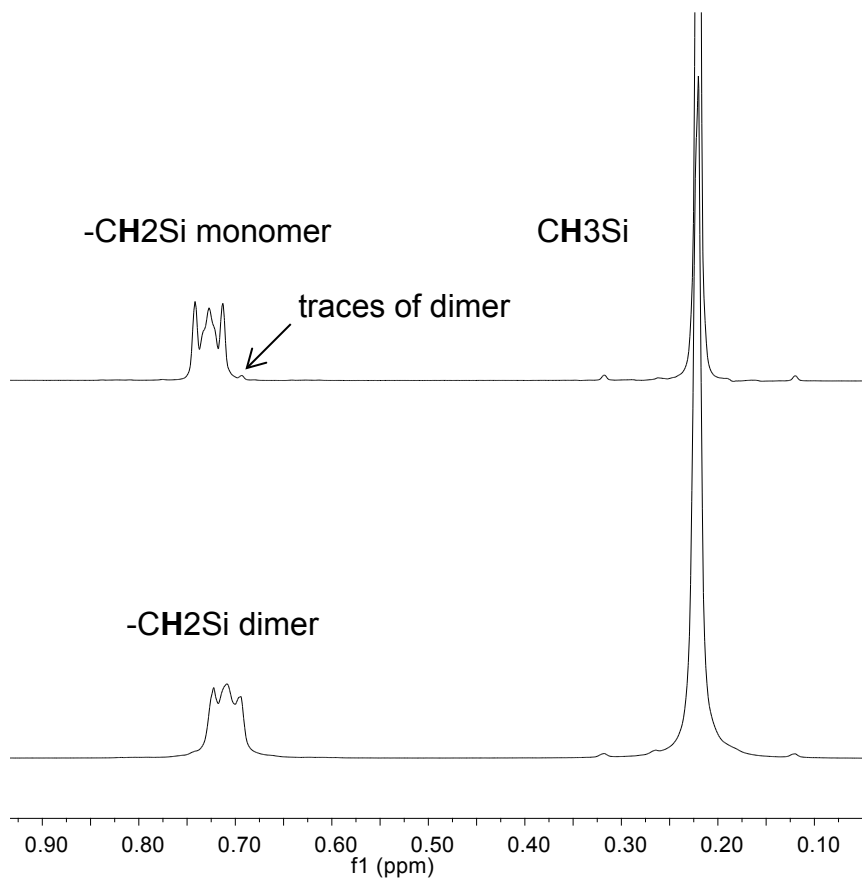

**Figure S34.** From monomer to dimer upon lyophilization. Top :  $^1\text{H}$  NMR spectrum of **2a** in  $\text{D}_2\text{O}/0.1\%$  TFA before lyophilization; bottom :  $^1\text{H}$  NMR spectrum of the same sample after freeze-drying

# Supporting information

## N-ter hybrid monomer 4

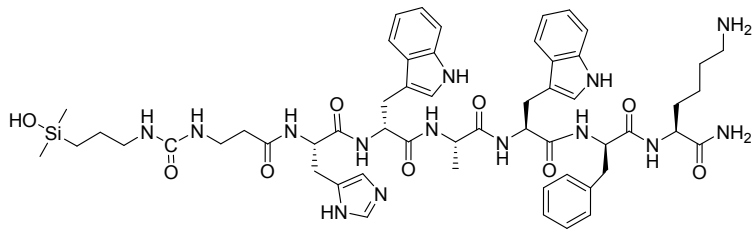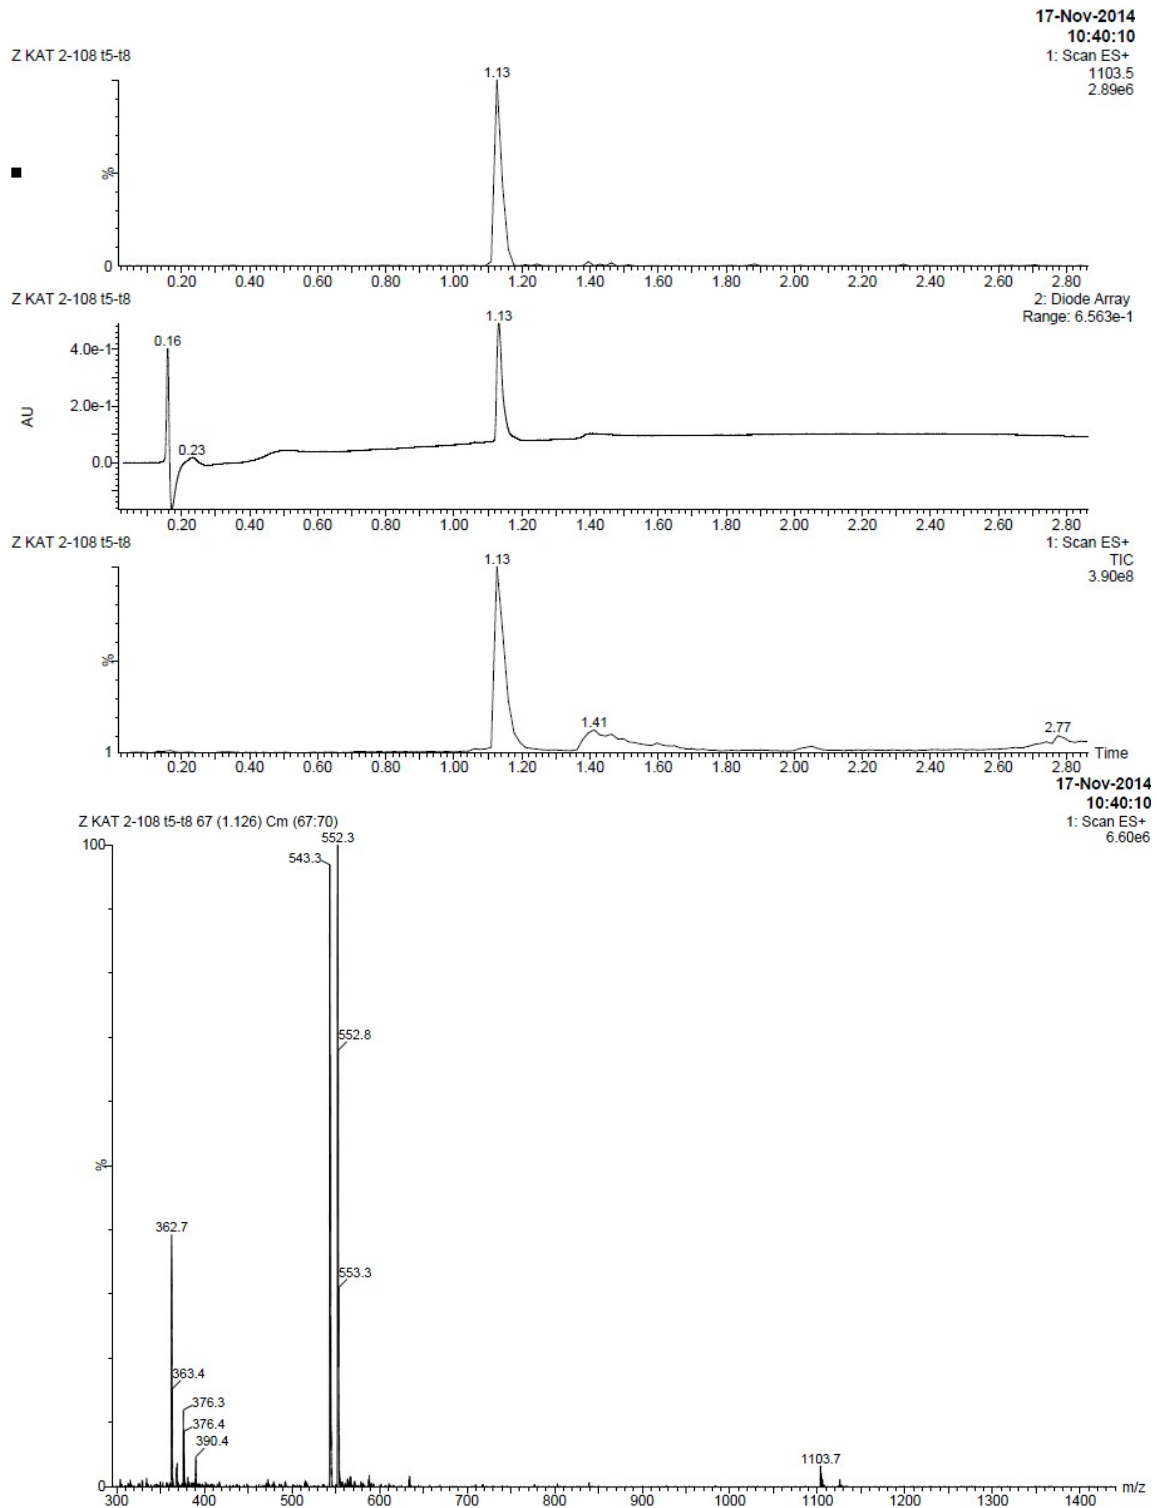

Figure S35. LC/MS spectrum of 4

## Supporting information

### N-ter hybrid dimer 5 (JMV 6187)

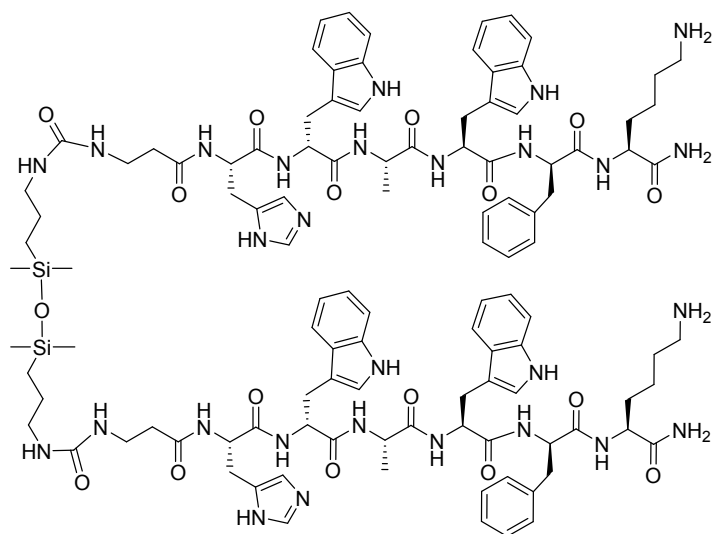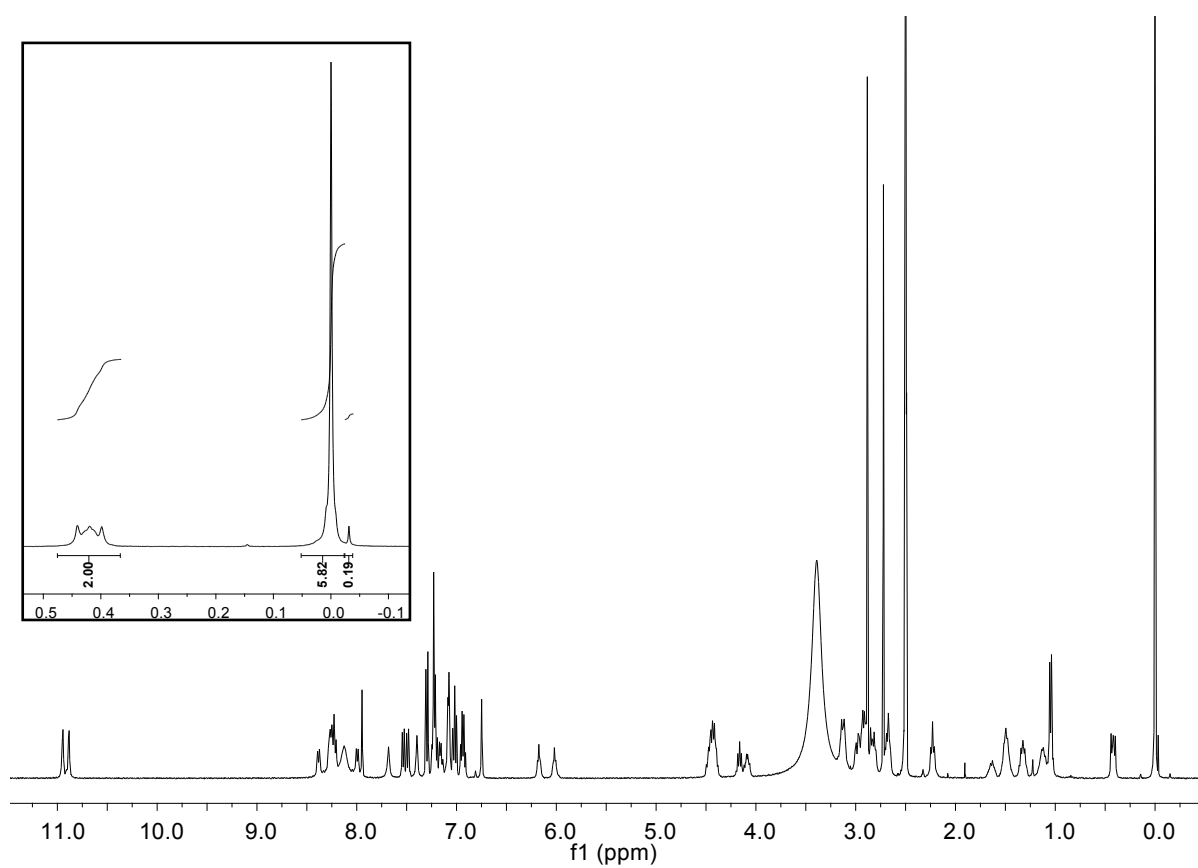

**Figure S36.** <sup>1</sup>H NMR spectrum of 5 in DMSO-*d*<sub>6</sub> (400 MHz)

## Supporting information

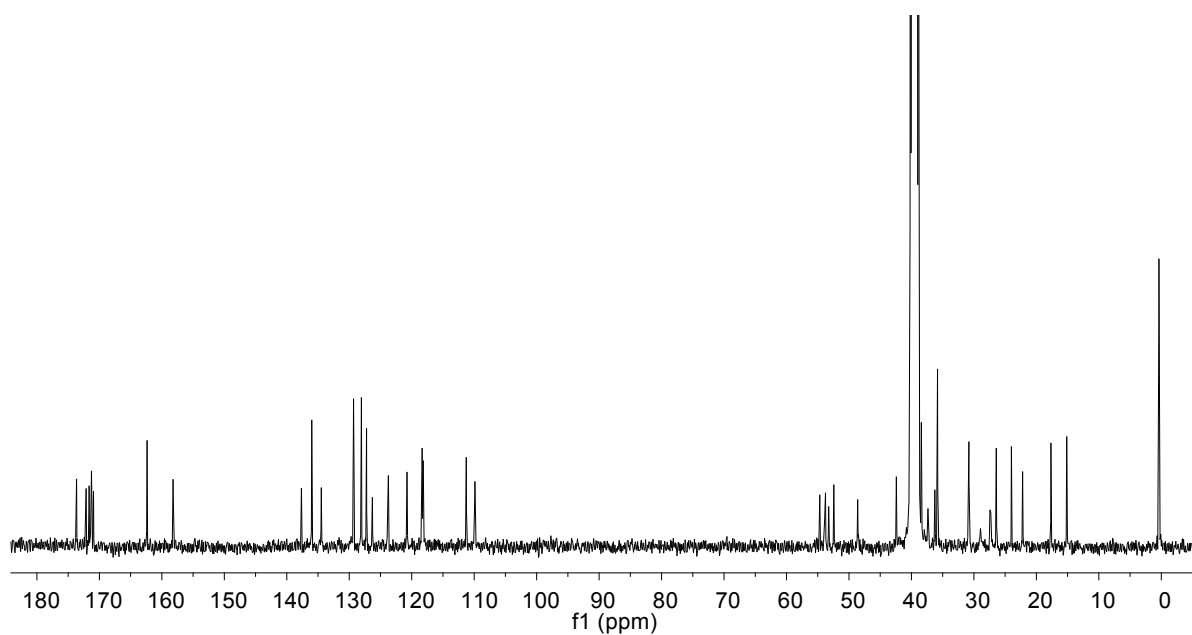

**Figure S37.**  $^{13}\text{C}$  NMR spectrum of **5** in  $\text{DMSO-d}_6$  (101 MHz)

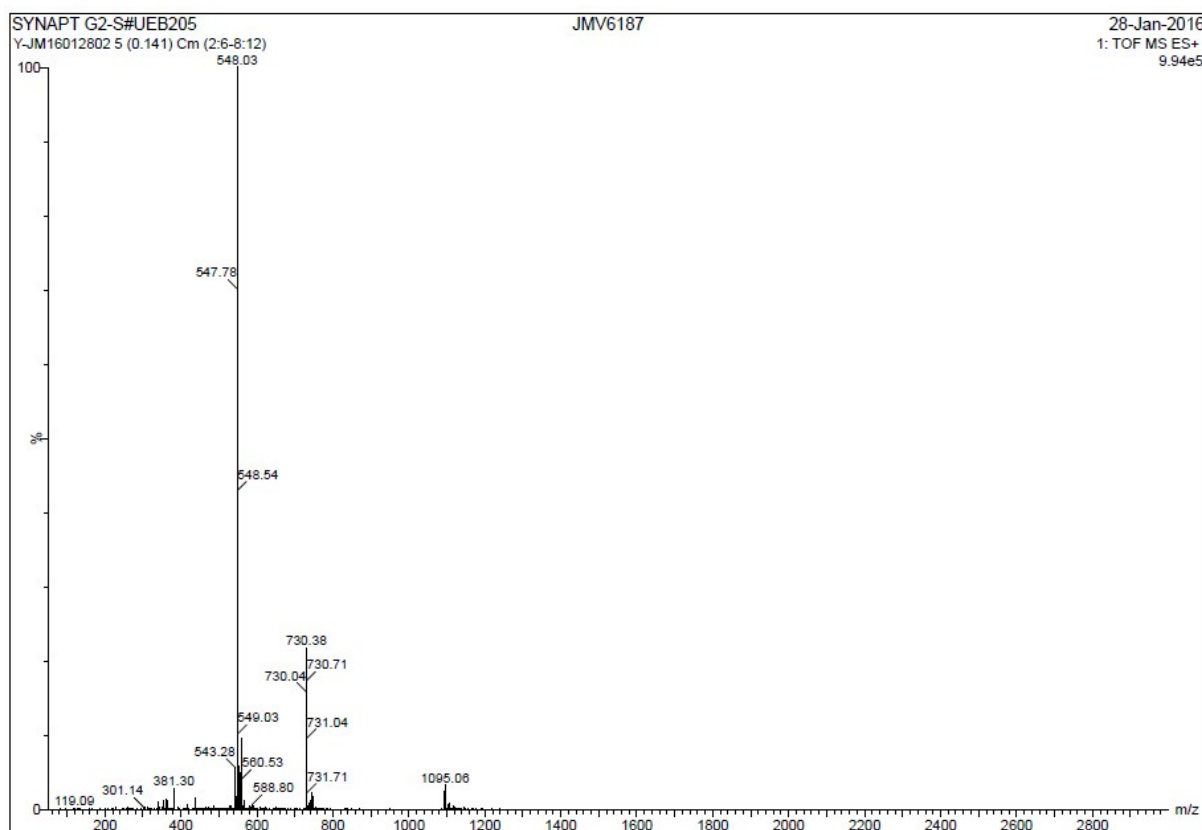

## Supporting information

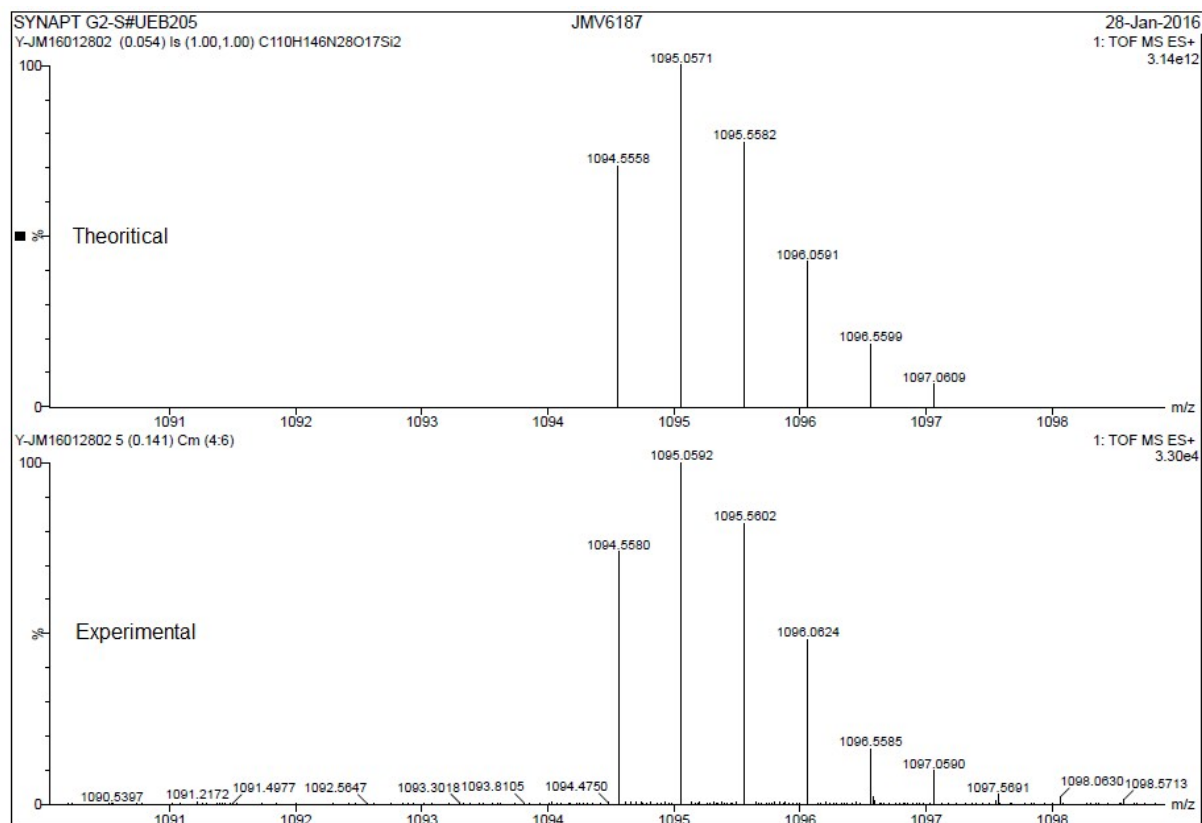

**Figure S38.** HR-MS analysis of **5**

### C-ter hybrid monomer **6**

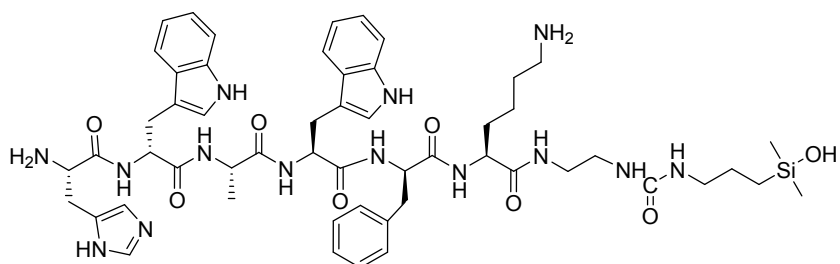

# Supporting information

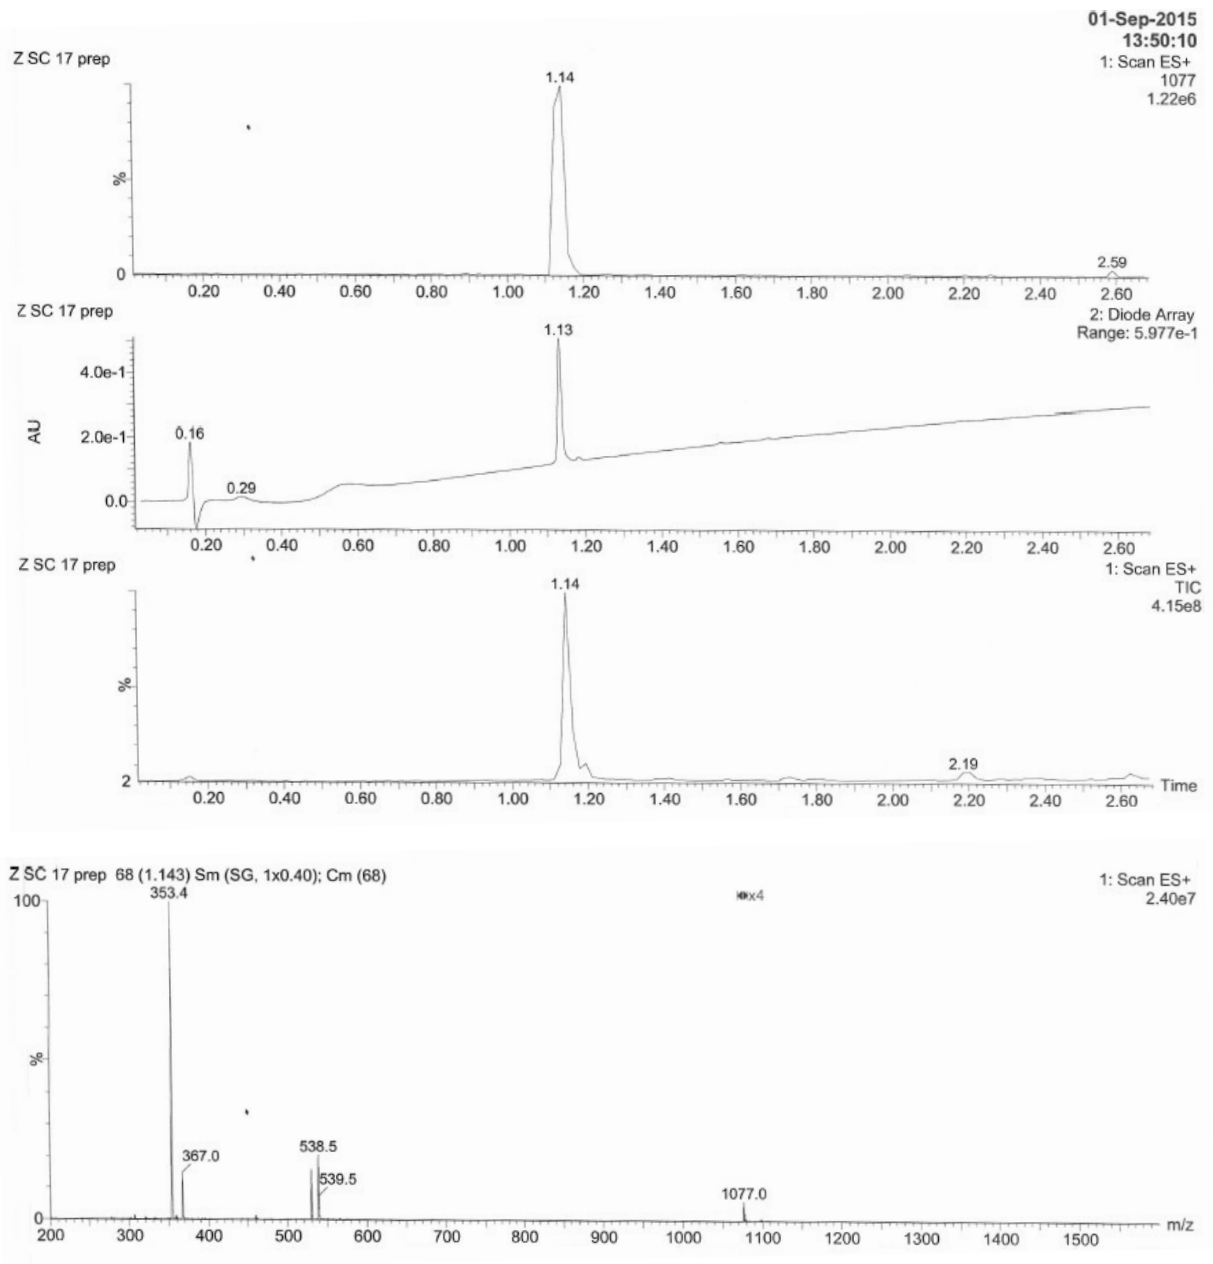

Figure S39. LC/MS spectrum of 6

## Supporting information

### C-ter hybrid dimer 7 (JMV 6186)

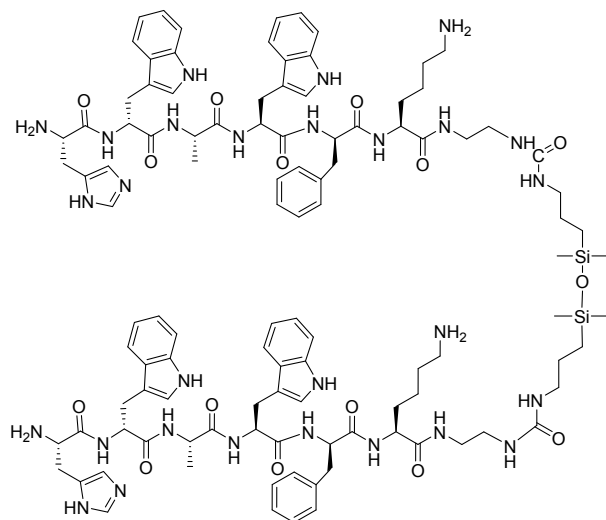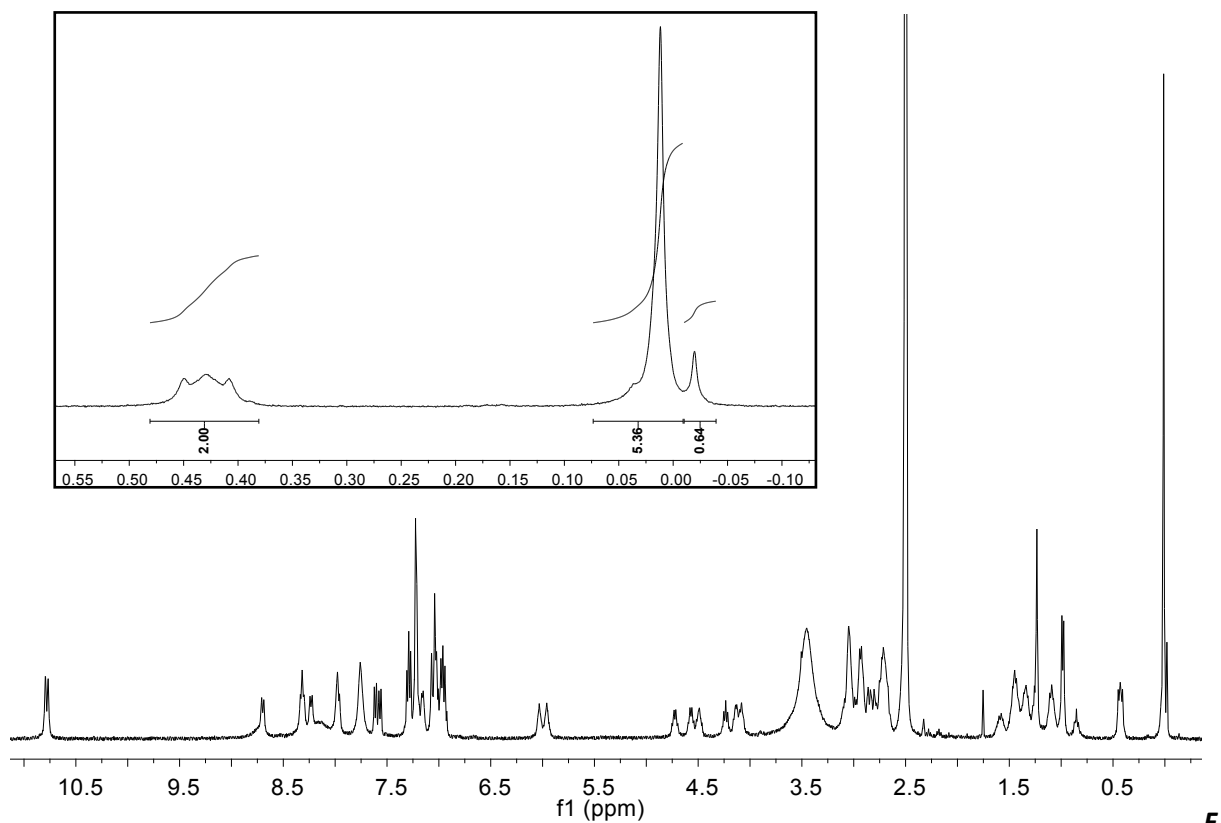

figure S40. <sup>1</sup>H NMR spectrum of 7 in DMSO-d<sub>6</sub> (400 MHz)

## Supporting information

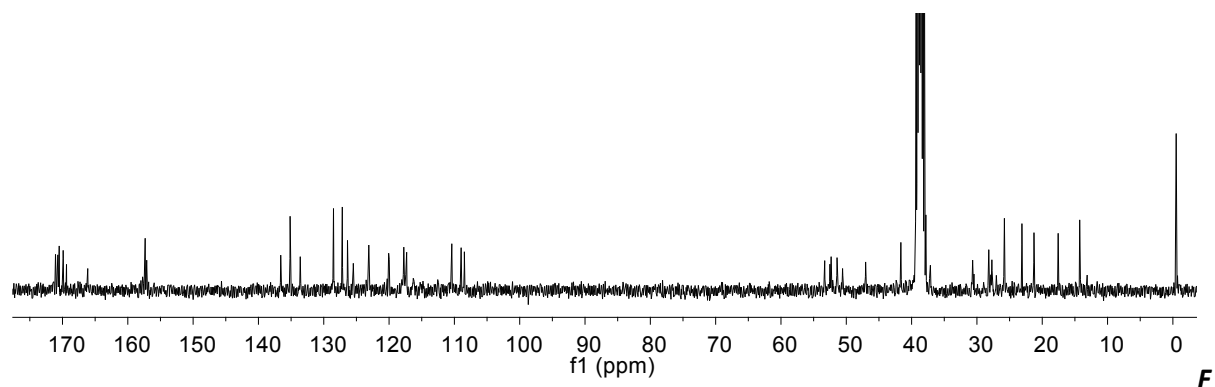

**figure S41.**  $^{13}\text{C}$  NMR spectrum of **7** in  $\text{DMSO-d}_6$  (101 MHz)

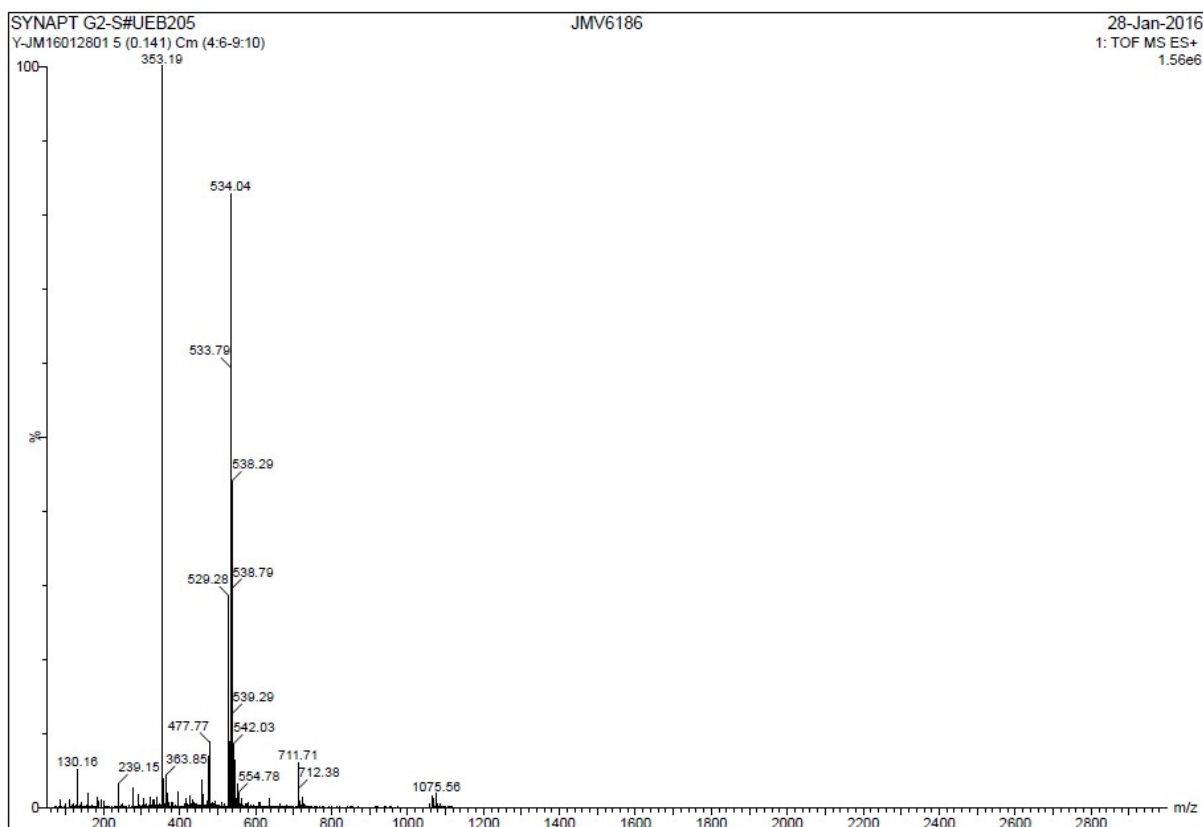



## Supporting information

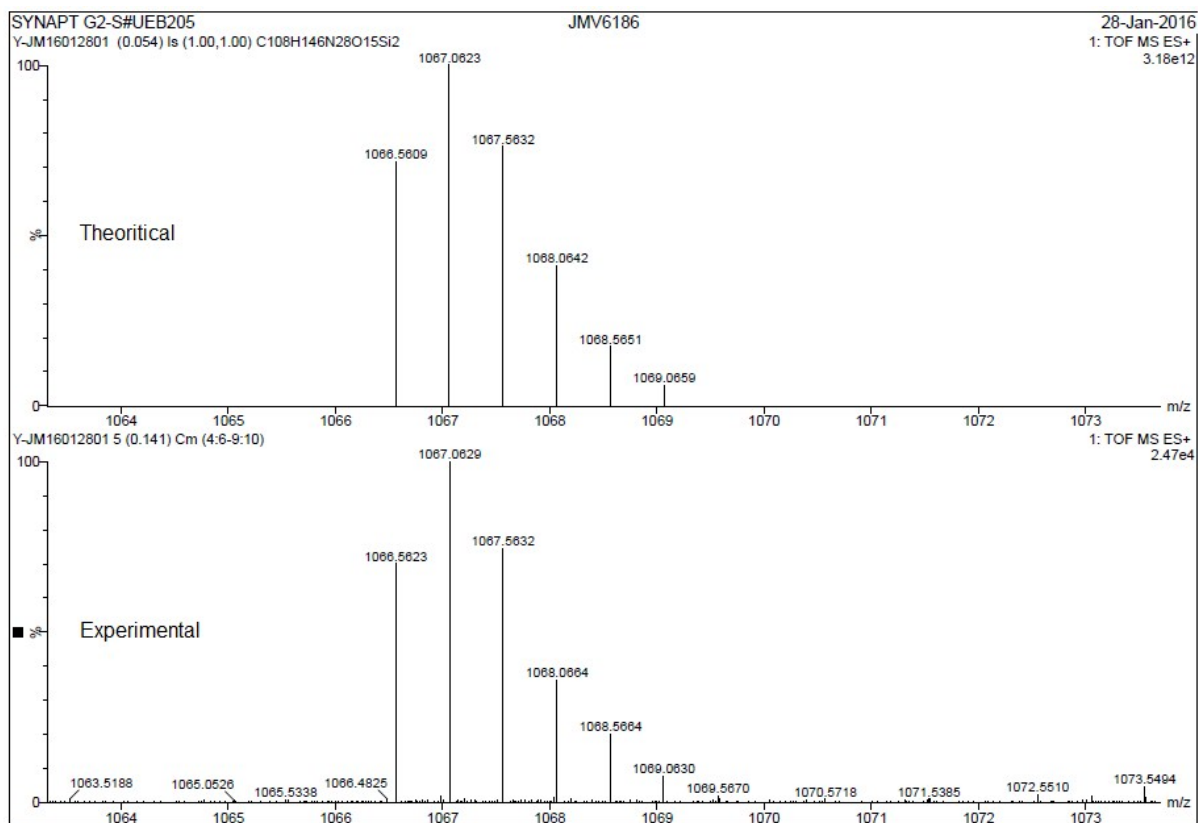

Figure S42. HR-MS analysis of **7**

### Lys<sup>3</sup> hybrid monomer **8**

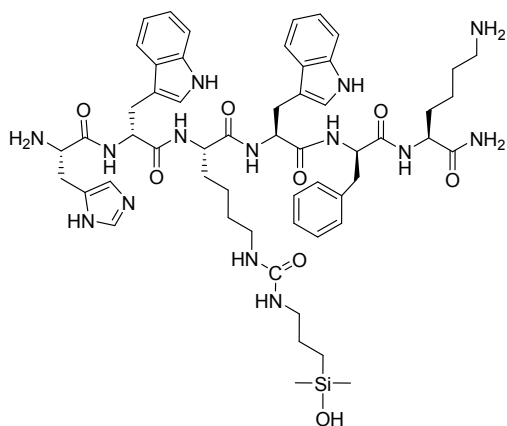

## Supporting information

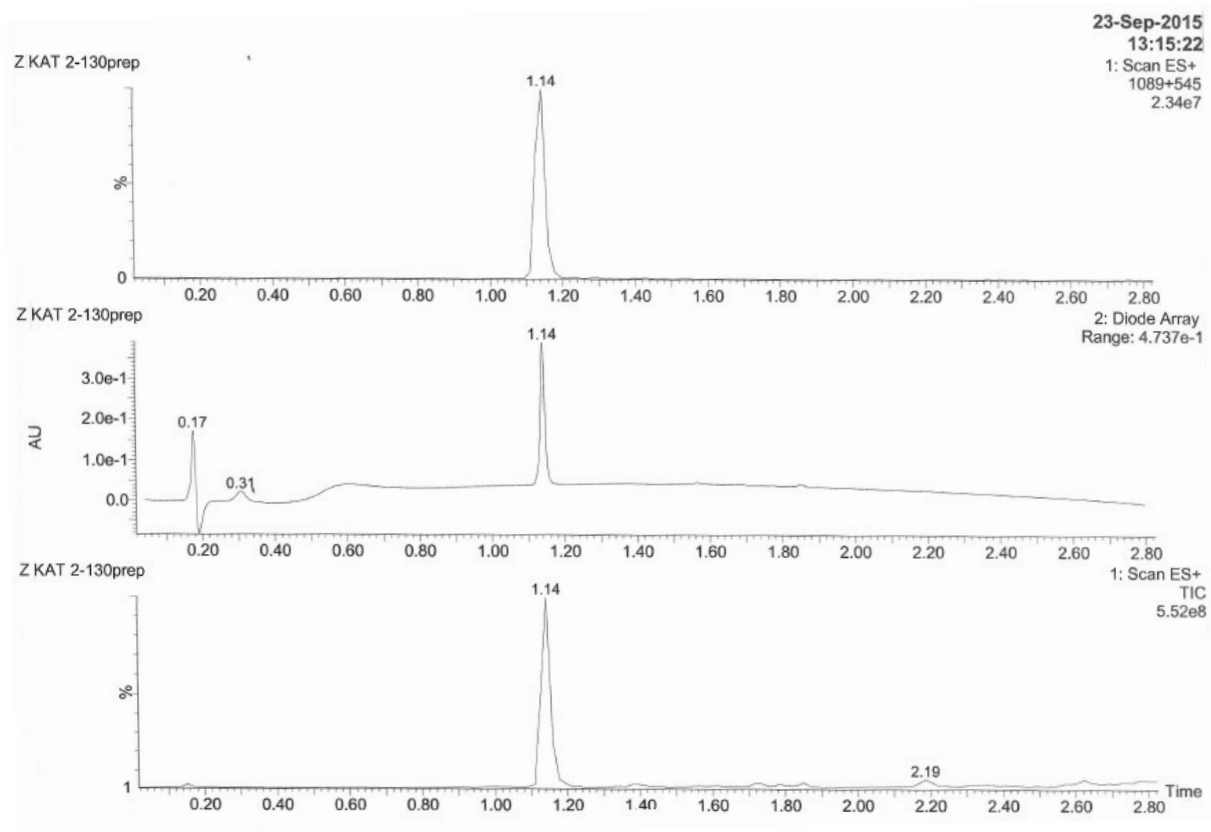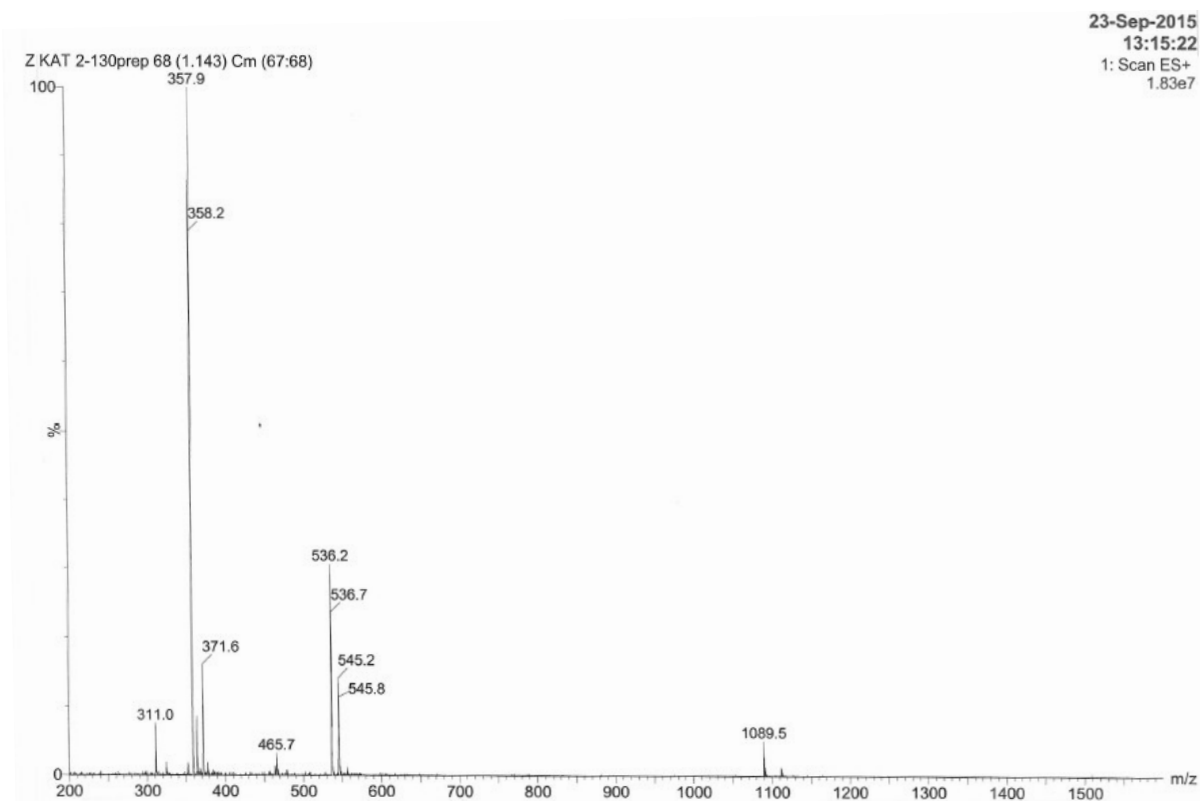

Figure S43. LC/MS spectrum of **8**

## Supporting information

### Lys<sup>3</sup> hybrid dimer **9** (JMV 6185)

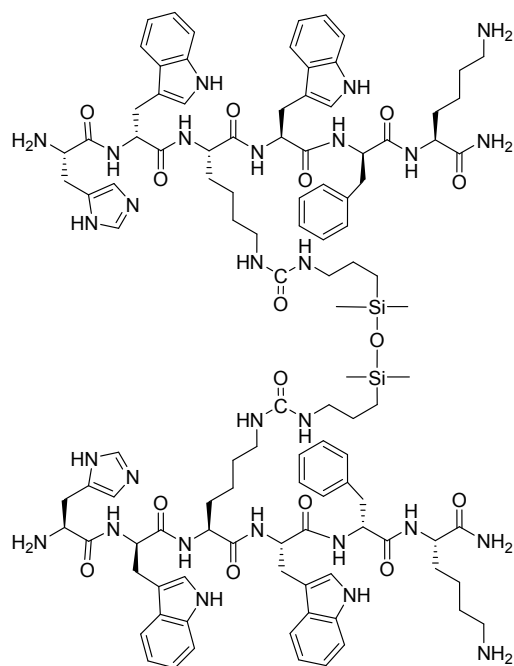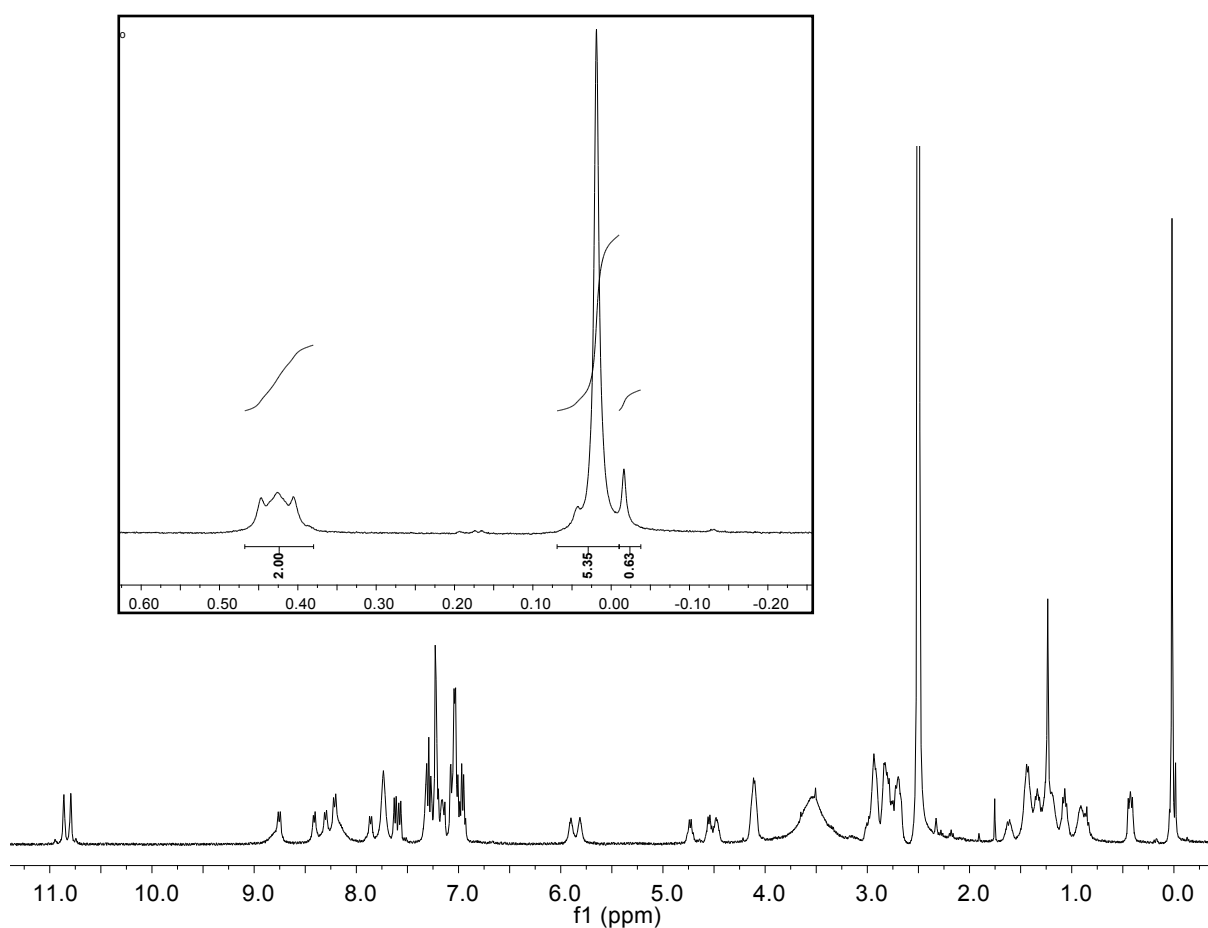

**Figure S44.** <sup>1</sup>H NMR spectrum of **9** in DMSO-*d*<sub>6</sub> (400 MHz)

## Supporting information

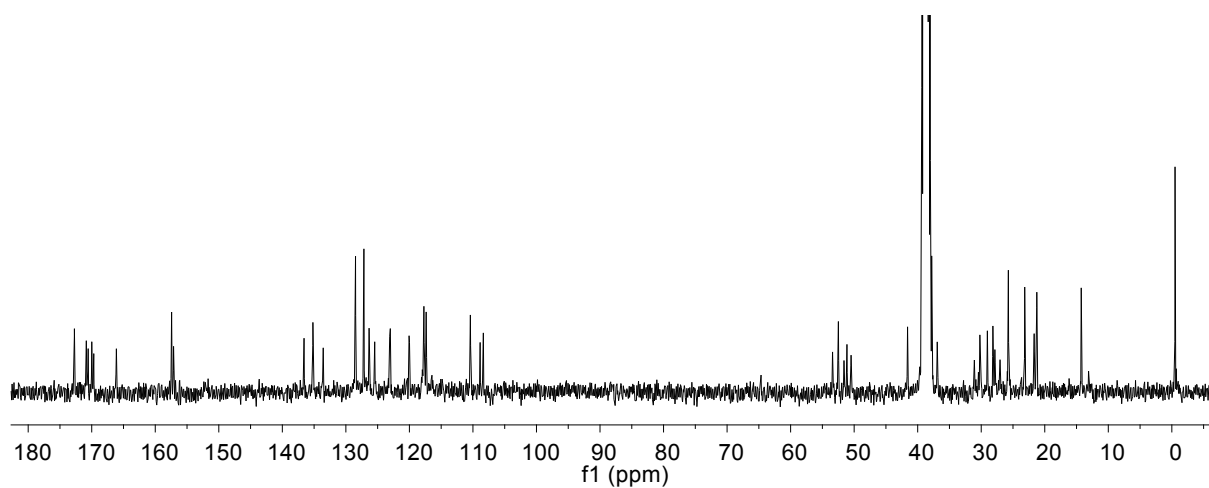

**Figure S45.**  $^{13}\text{C}$  NMR spectrum of **9** in  $\text{DMSO-d}_6$  (101 MHz)

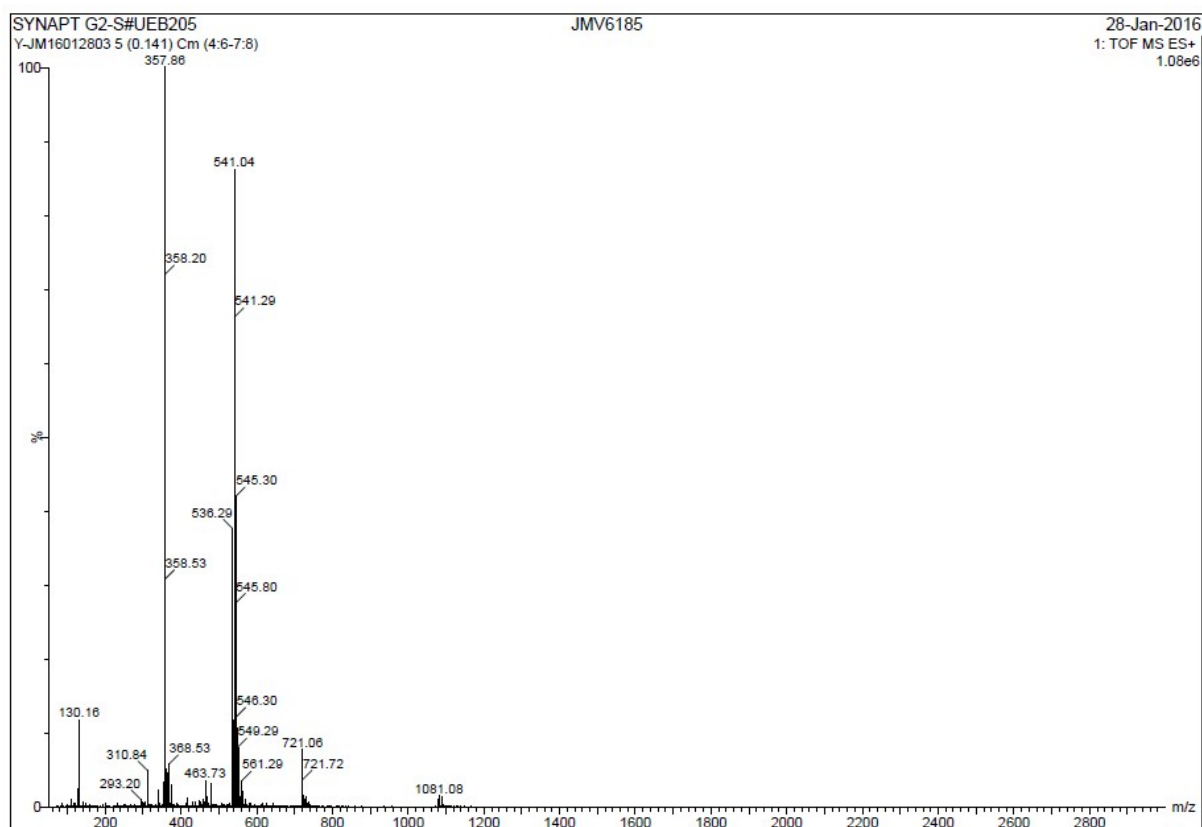

## Supporting information

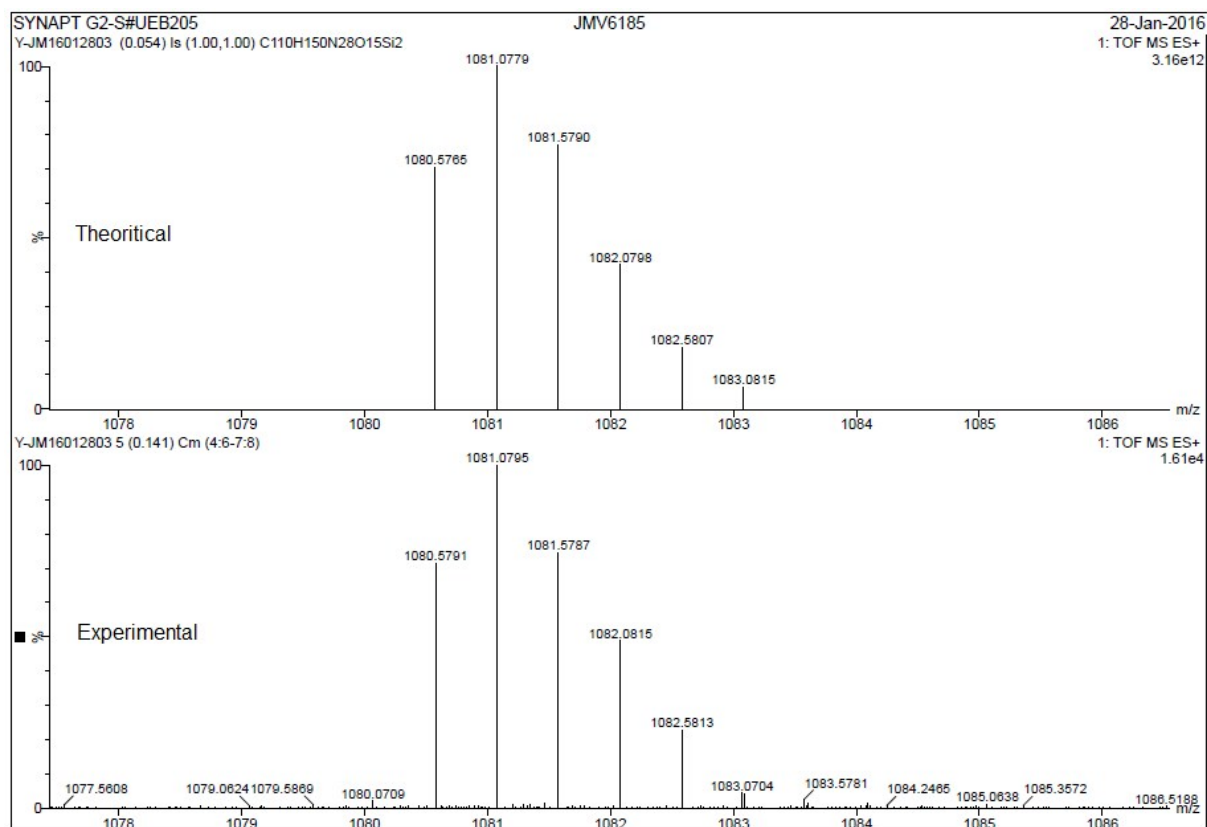

Figure S46. HR-MS analysis of **9**

### Lys<sup>3</sup>(NH(CH<sub>2</sub>)<sub>3</sub>Si(CH<sub>3</sub>)<sub>3</sub>) monomer **10** (JMV 6246)

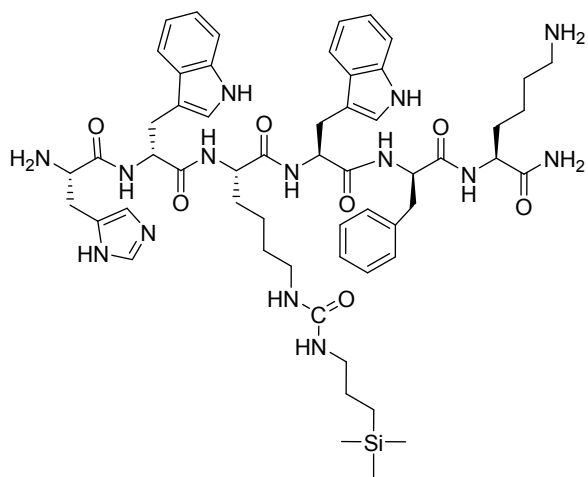

## Supporting information

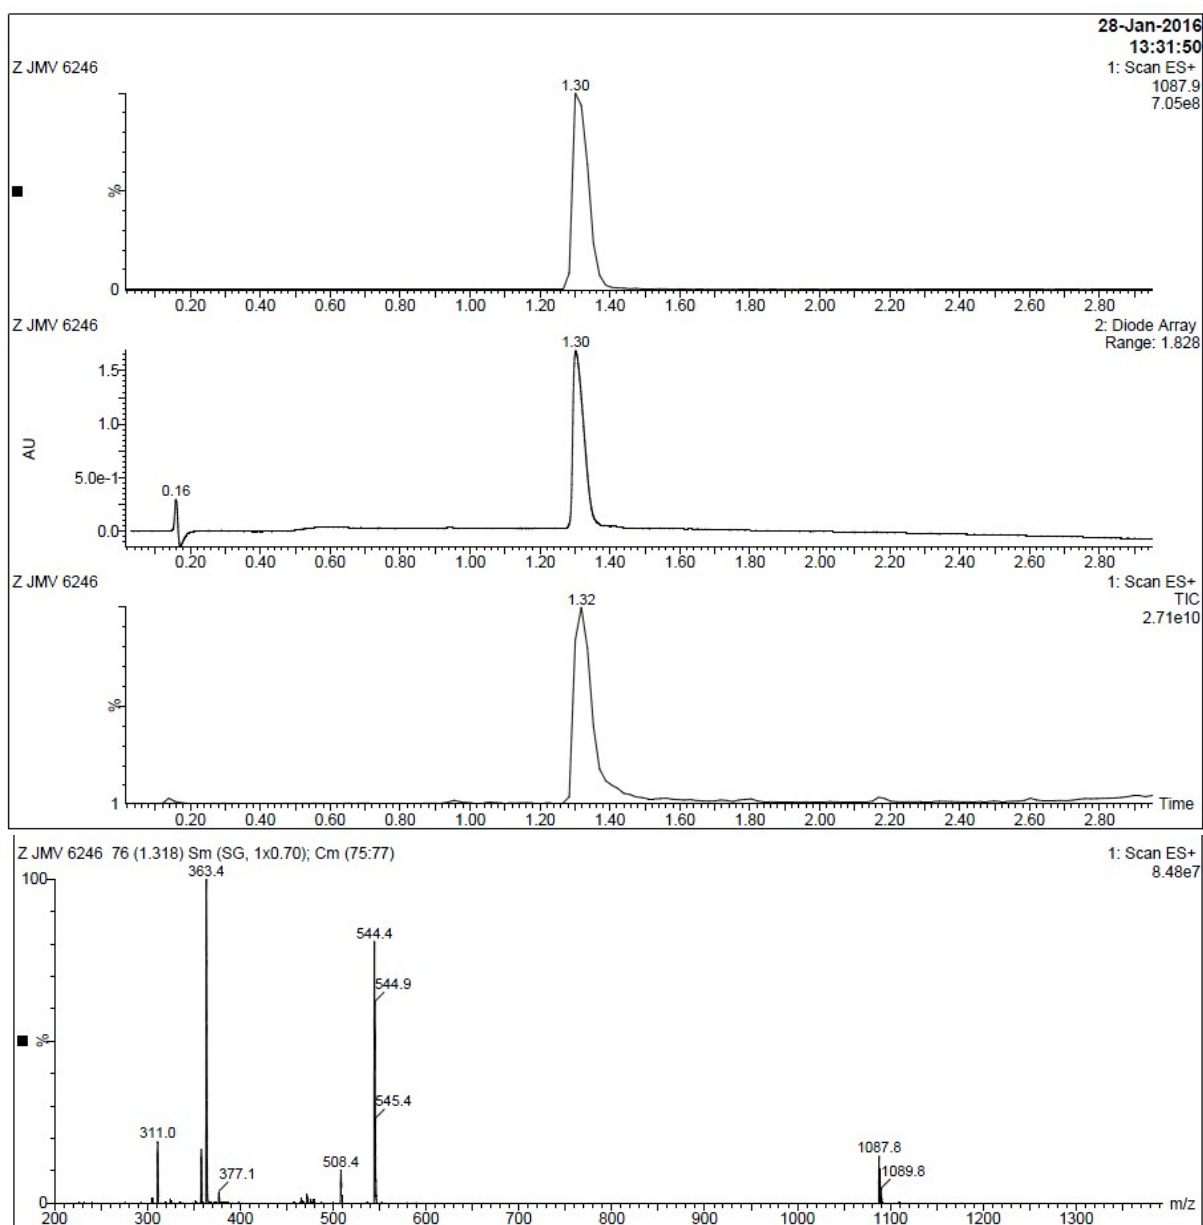

**Figure S47.** LC/MS spectrum of **10**

# Supporting information

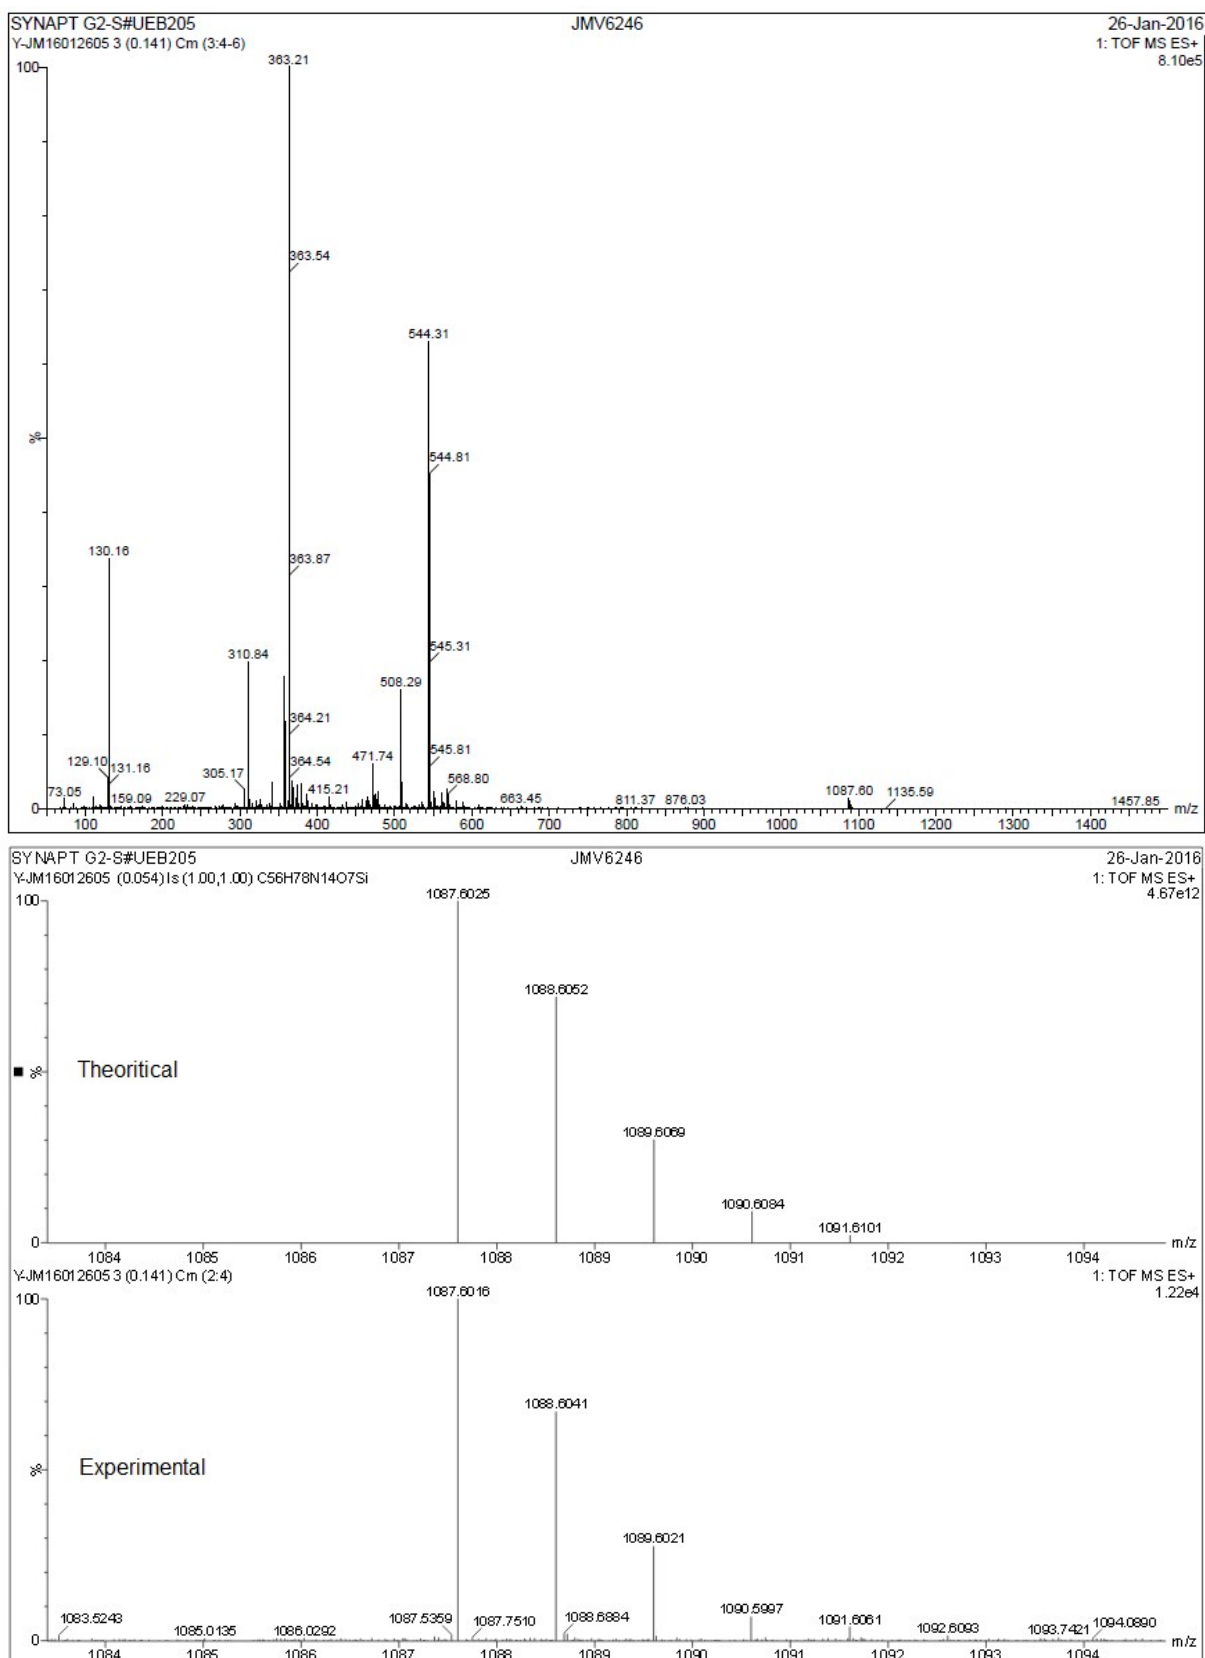

Figure S48. HR-MS analysis of 10

# Supporting information

## Lys<sup>3</sup> monomer 11 (JMV 6244)

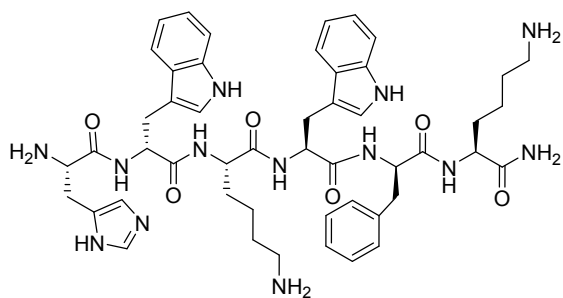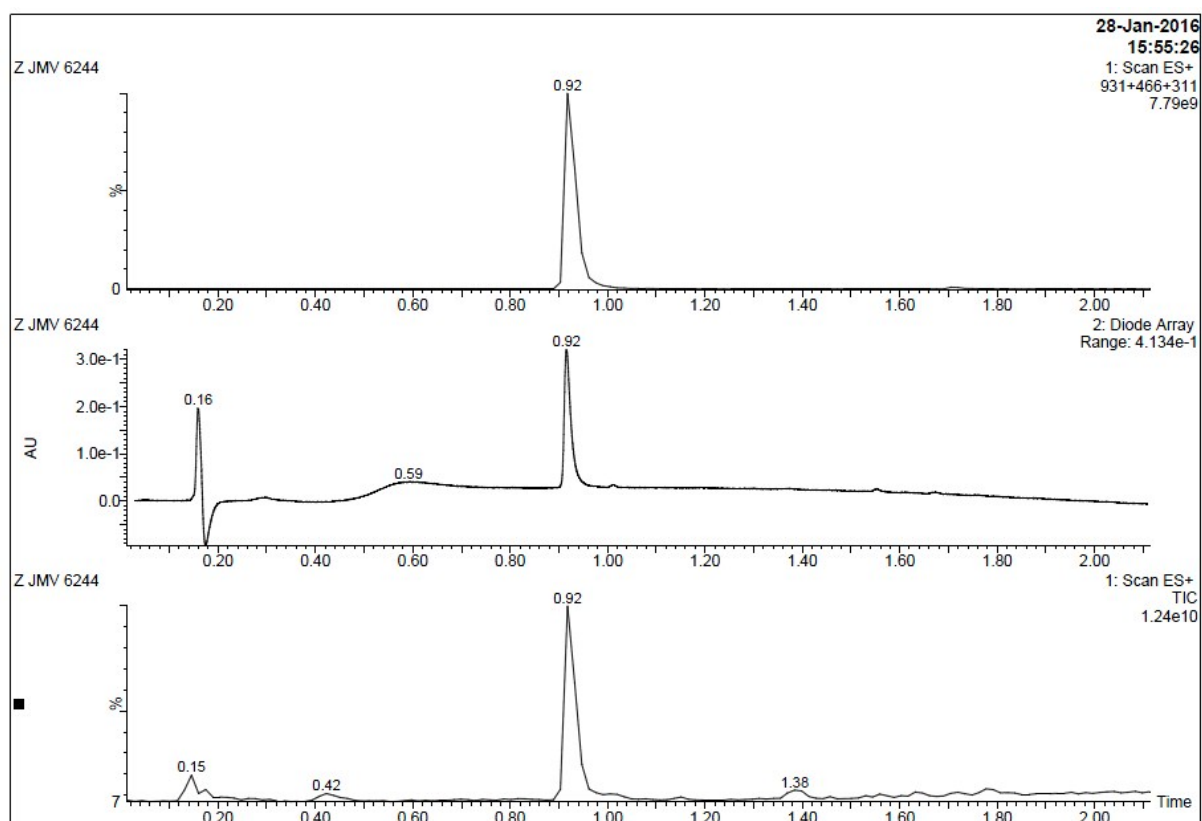



## Supporting information

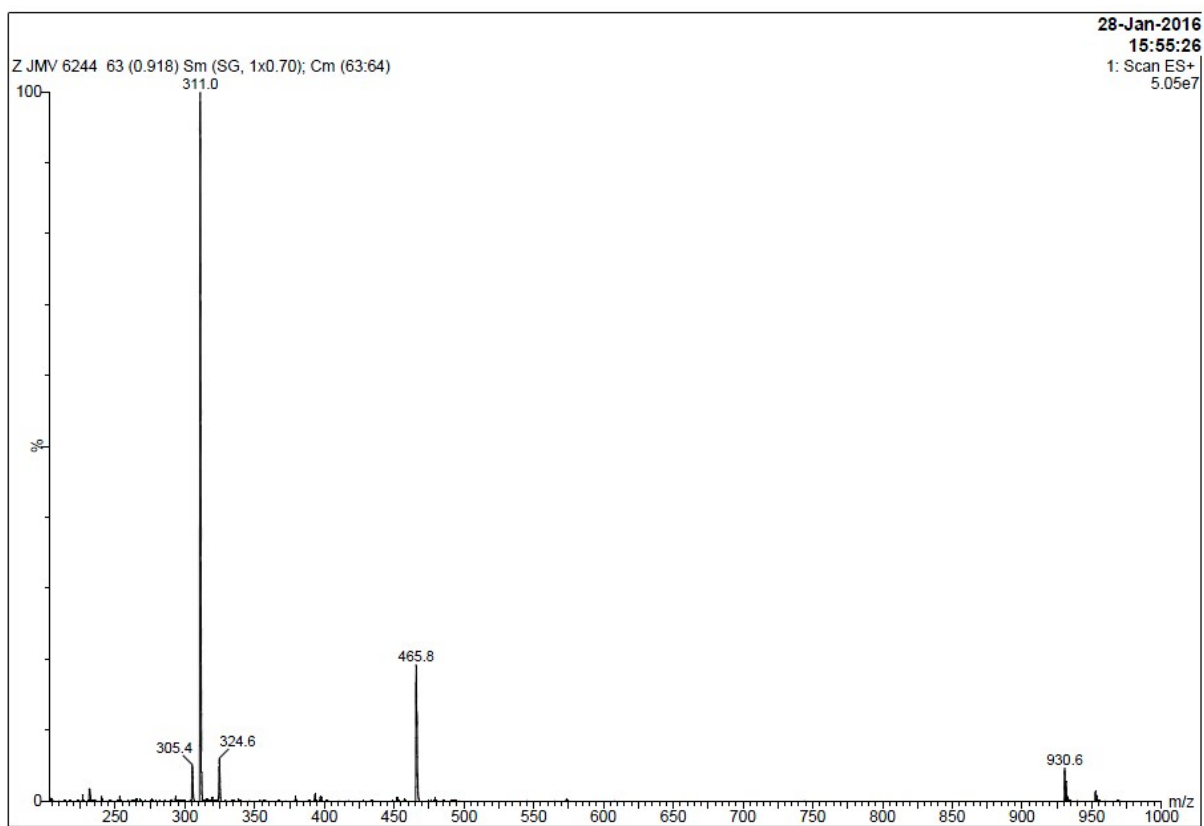

**Figure S49.** LC-MS spectrum of **11**

# Supporting information

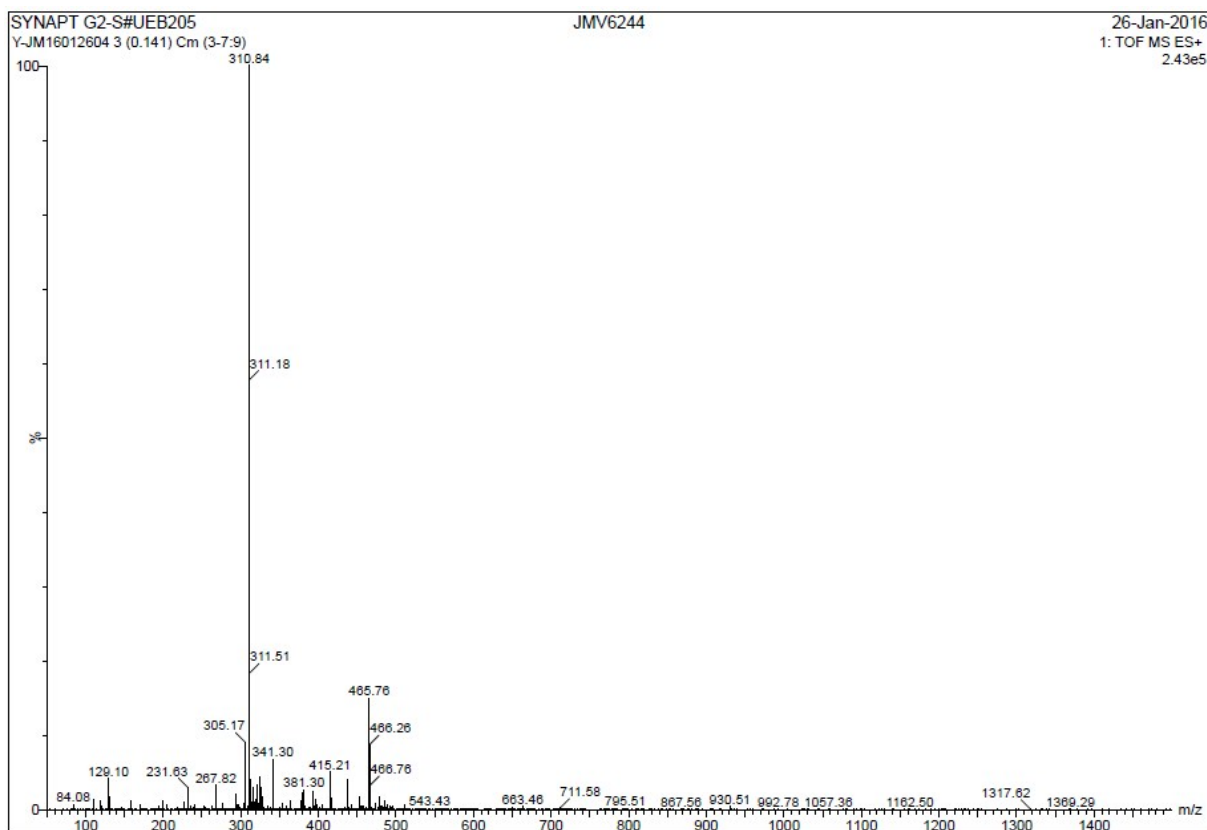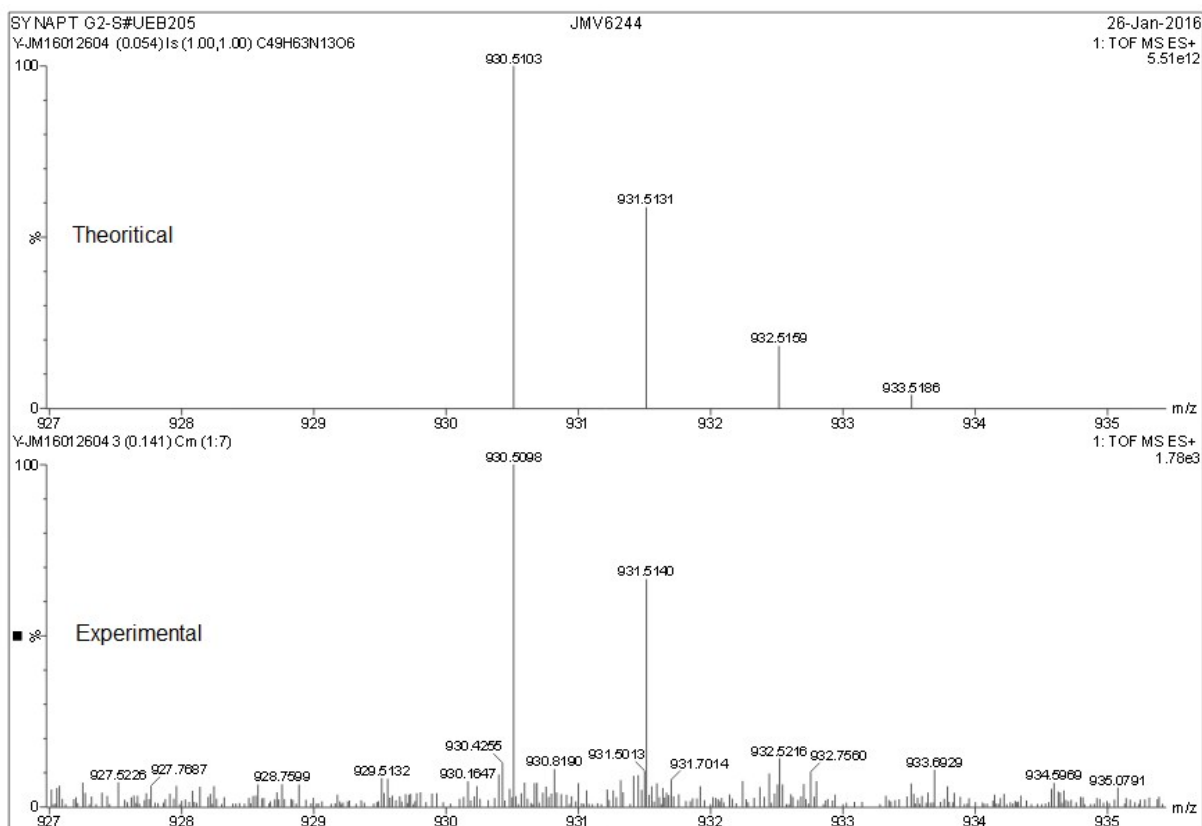

Figure S50. HR-MS analysis of 11

# Supporting information

## Lys<sup>3</sup>(Ac) monomer 12 (JMV 6245)

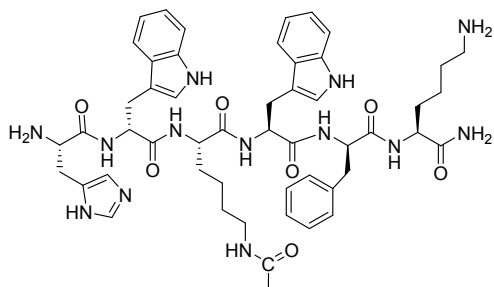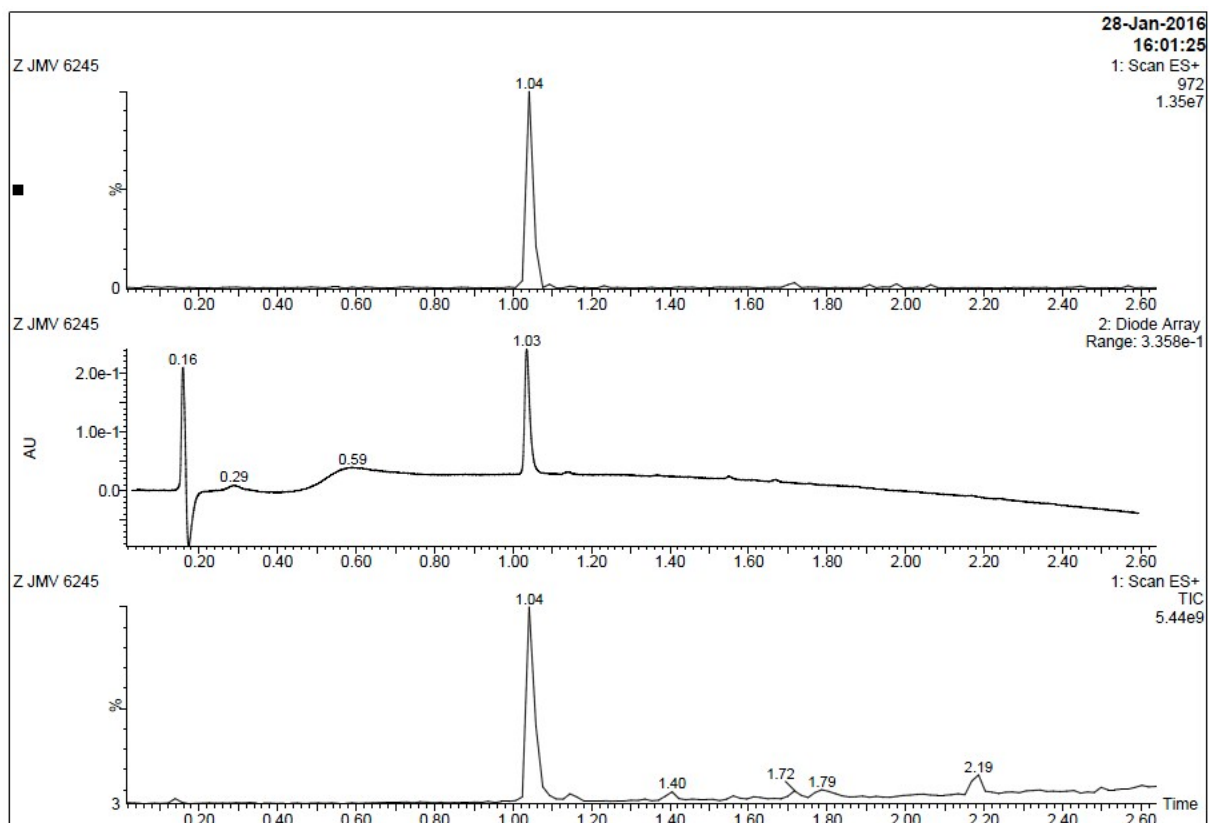

## Supporting information

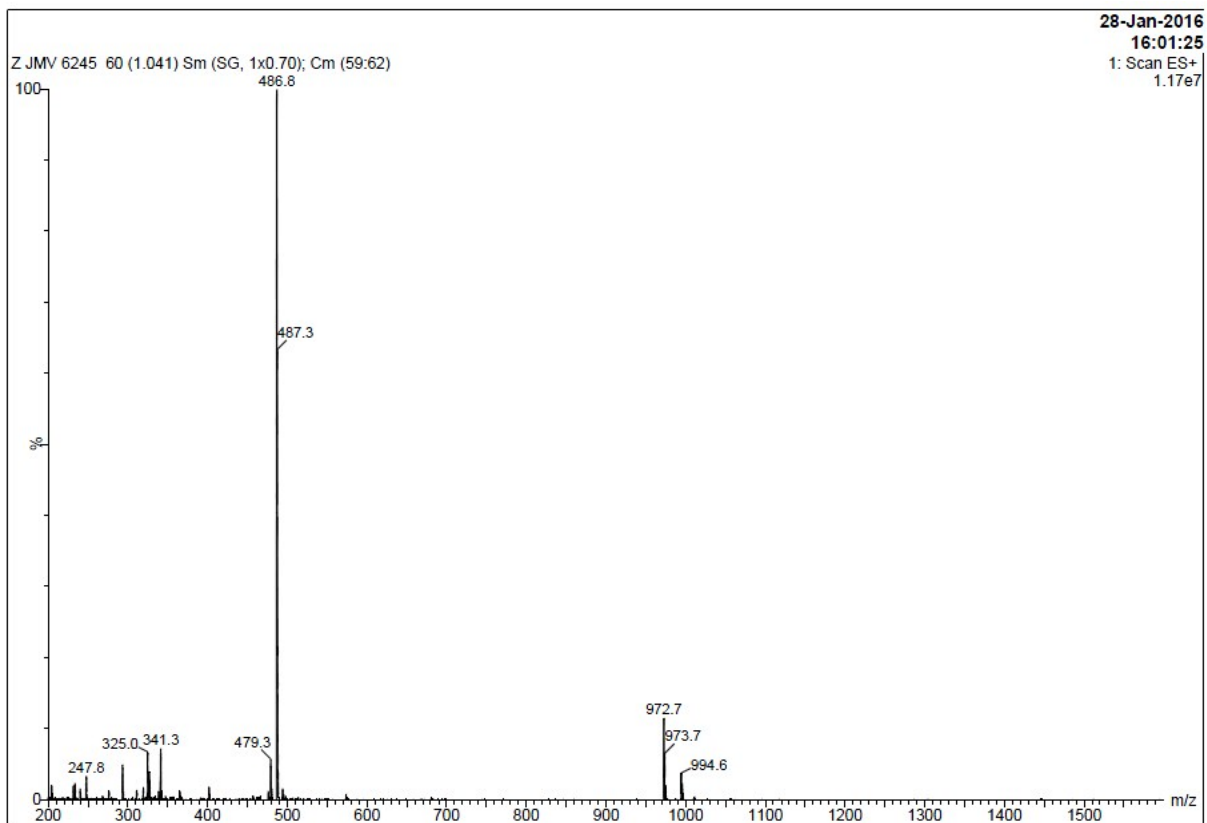

**Figure S51.** LC-MS spectrum of **12**

# Supporting information

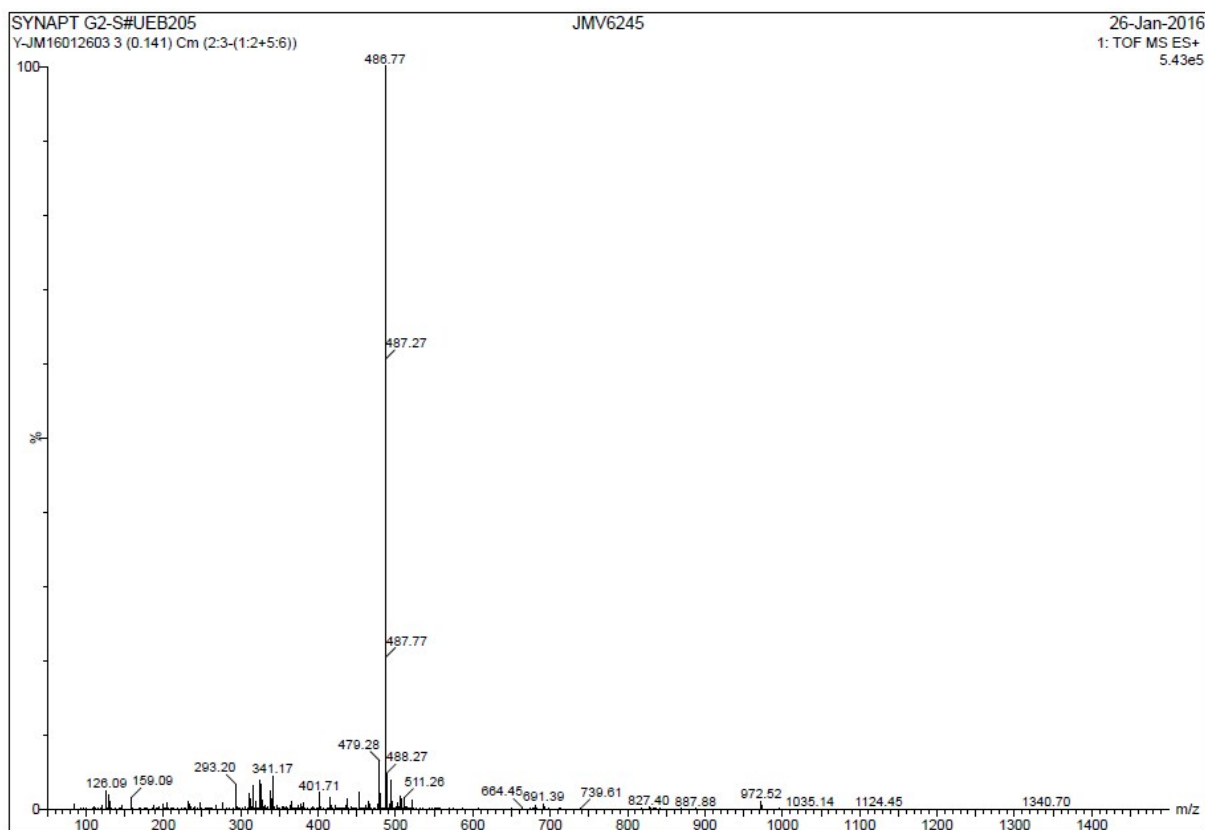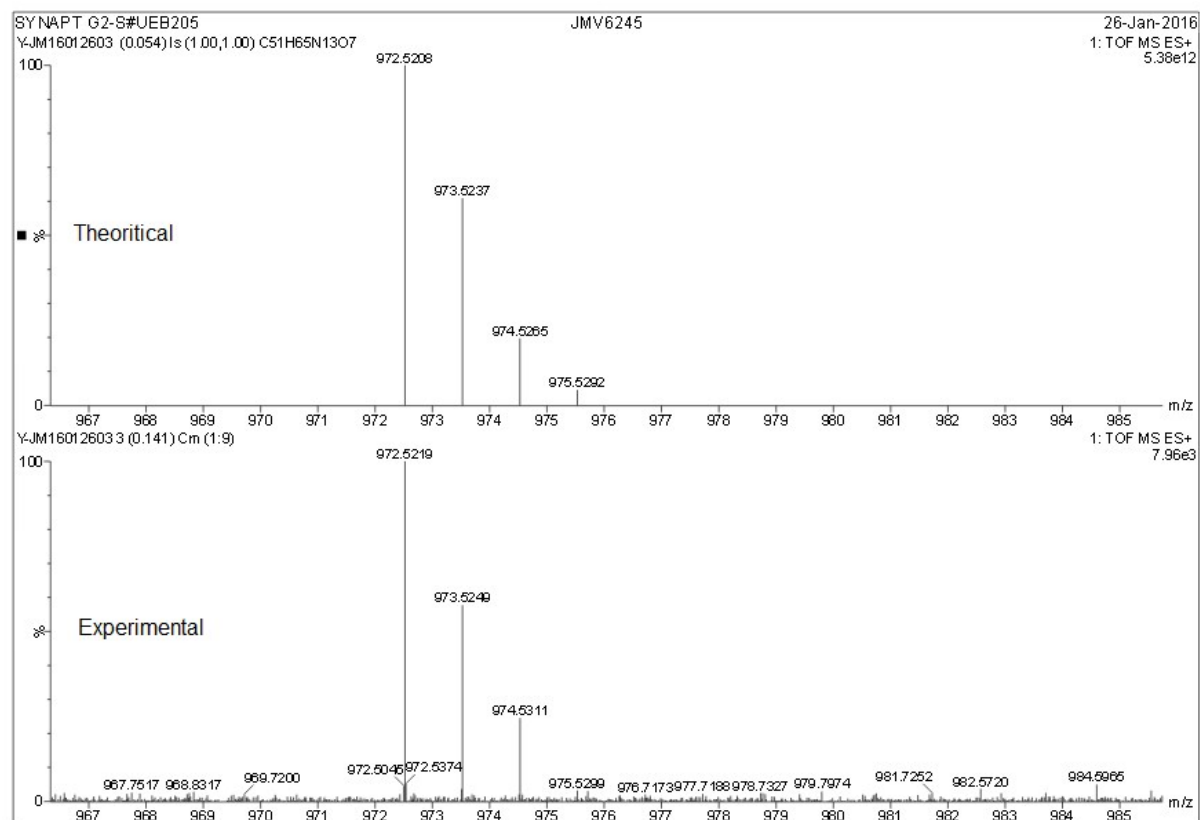

Figure S52. HR-MS spectrum of 12

## Supporting information

### Monomeric ligand binding assay

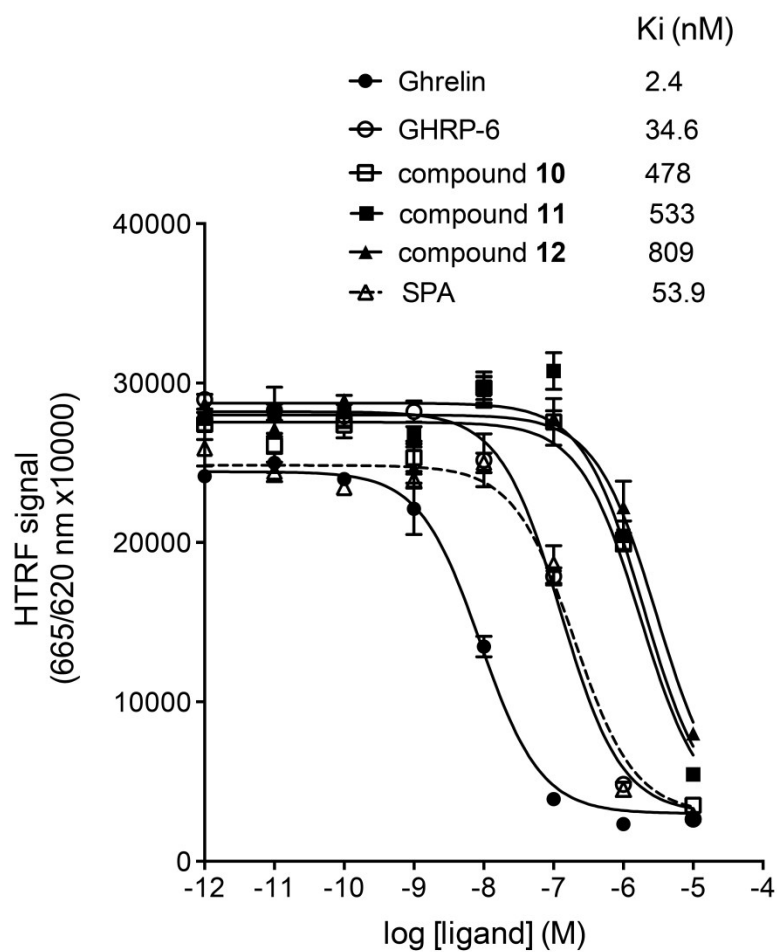

**Figure S53.** Binding of compounds 10, 11 and 12, monomeric analogues of dimer 9, to GHS-R1a. Ligands affinities were determined by HTRF-based competition binding assay performed on intact HEK293T cells as described in Materials and Methods. Results are from one representative experiment of two, each performed in triplicate.

## Supporting information

### Bioactivity of monomeric ligands

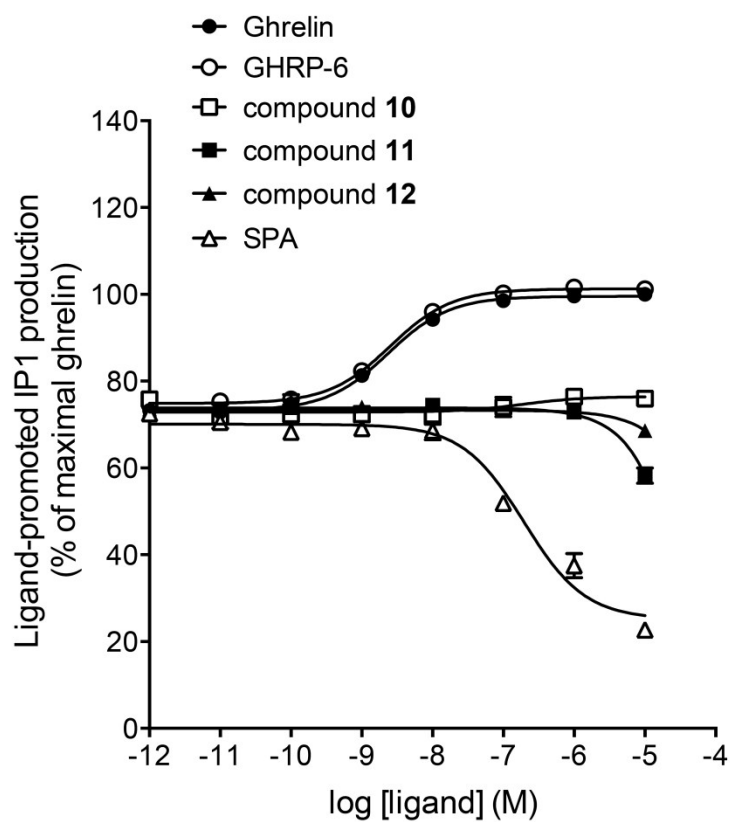

**Figure S54.** Signaling property of compounds **10**, **11** and **12**. Efficacy of ligands to stimulate IP1 production was measured on HEK293T cells expressing the GHS-R1a as described in Materials and Methods. Results are one representative experiment of two, each performed in triplicate.
